# Evaluating the reliability of human brain white matter tractometry

John Kruper<sup>a,b</sup>, Jason D. Yeatman<sup>c,d</sup>, Adam Richie-Halford<sup>b</sup>, David Bloom<sup>a,b</sup>, Mareike Grotheer<sup>e,f</sup>, Sedy Caffarra<sup>c,d,g</sup>, Gregory Kiar<sup>h</sup>, Iliana I. Karipidis<sup>i</sup>, Ethan Roy<sup>c</sup>, Bramsh Q. Chandio<sup>j</sup>, Eleftherios Garyfallidis<sup>i</sup>, and Ariel Rokem<sup>1a,b</sup>

<sup>a</sup>Department of Psychology, University of Washington, Seattle, WA, 98195, United States of America

<sup>b</sup>Science Institute, University of Washington, Seattle, WA, 98195, United States of America

<sup>c</sup>Graduate School of Education, Stanford University, Stanford, CA, 94305, United States of America

<sup>d</sup>Division of Developmental-Behavioral Pediatrics, Stanford University School of Medicine, Stanford, CA, 94305, United States of America

<sup>e</sup>Center for Mind, Brain and Behavior - CMBB, Hans-Meerwein-Straße 6, Marburg 35032, Germany

<sup>f</sup>Department of Psychology, University of Marburg, Marburg 35039, Germany

<sup>g</sup>Basque Center on Cognition, Brain and Language, BCBL, 20009, Spain

<sup>h</sup>Department of Biomedical Engineering, McGill University, Montreal, H3A 0E9, Canada

<sup>i</sup>Center for Interdisciplinary Brain Sciences Research, Department of Psychiatry and Behavioral Sciences, Stanford University School of Medicine, Stanford, CA, 94305, United States of America

<sup>j</sup>Department of Intelligent Systems Engineering, Luddy School of Informatics, Computing and Engineering, Indiana University Bloomington, Bloomington, IN, 47408, United States of America

The validity of research results depends on the reliability of analysis methods. In recent years, there have been concerns about the validity of research that uses diffusion-weighted MRI (dMRI) to understand human brain white matter connections *in vivo*, in part based on reliability of the analysis methods used in this field. We defined and assessed three dimensions of reliability in dMRI-based tractometry, an analysis technique that assesses the physical properties of white matter pathways: (1) reproducibility, (2) test-retest reliability and (3) robustness. To facilitate reproducibility, we provide software that automates tractometry (<https://yeatmanlab.github.io/pyAFQ>). In measurements from the Human Connectome Project, as well as clinical-grade measurements, we find that tractometry has high test-retest reliability that is comparable to most standardized clinical assessment tools. We find that tractometry is also robust: showing high reliability with different choices of analysis algorithms. Taken together, our results suggest that tractometry is a reliable approach to analysis of white matter connections. The overall approach taken here both demonstrates the specific trustworthiness of tractometry analysis and outlines what researchers can do to demonstrate the reliability of computational analysis pipelines in neuroimaging.

Diffusion MRI | Brain Connectivity | Tractography | Reproducibility | Robustness

Correspondence: [arokem@uw.edu](mailto:arokem@uw.edu)

## 1 Introduction

2 The white matter of the brain contains the long-range connections between distant cortical regions. The integration and coordination of brain activity through the fascicles containing these connections is important for information processing and for brain health (1, 2). Using voxel-specific directional diffusion information from diffusion-weighted MRI (dMRI), computational tractography produces three-dimensional trajectories through the white matter within the MRI volume that are called “streamlines” (3, 4). Collections of streamlines that match the location and direction of major white matter pathways within an individual can be generated with different strategies: using probabilistic (5, 6) or streamline-based (7, 8) atlases, or known anatomical landmarks (9–12). Because

15 these are models of the anatomy, we refer to these estimates as “bundles” to distinguish them from the anatomical pathways themselves. The delineation of well-known anatomical pathways overcomes many of the concerns about confounds in dMRI-based tractography (13, 14), because “brain connections derived from diffusion MRI tractography can be highly anatomically accurate – if we know where white matter pathways start, where they end, and where they do not go” (15).

16 The physical properties of the tissue affect the diffusion of water within the brain and the microstructure of tissue within the white matter along the length of computationally-generated bundles can be assessed using a variety of models (16, 17). Taken together, computational tractography, bundle recognition and diffusion modeling provide so-called “tract profiles”: estimates of microstructural properties of tissue along the length of major pathways. This is the basis of tractometry: statistical analysis that compares different groups, or assesses individual variability in brain connection structure (9, 18–21). For the inferences made from tractometry to be valid and useful, tract profiles need to be reliable.

17 In the present work, we provide an assessment of three different ways in which scientific results can be reliable: reproducibility, test-retest reliability, and robustness. These terms are often debated and conflicting definitions for these terms have been proposed (22, 23). Here, we use the definitions proposed in (24). *Reproducibility* is defined as the case in which data and methods are fully accessible and usable: running the same code with the same data should produce an identical result. Use of different data (e.g., in a test-retest experiment) resulting in quantitatively comparable results would denote *test-retest reliability* (TRR). In clinical science and psychology in general, TRR (e.g., in the form of inter-rater reliability) is considered a key metric of the reliability of a measurement. Use of a different analysis approach or different analysis system (e.g., different software implementation of the same ideas) could result in similar conclusions, denoting their *robustness* against implementation details. The recent findings of Botvinik-Nezer *et al* (25) show that even when full computational reproducibility is achieved, the re-

sults of analysing a single fMRI dataset can vary significantly between teams and analysis pipelines, demonstrating issues of robustness. The contribution of the present work is three-fold: To support reproducible research using tractometry, we developed an open-source software library called Automated Fiber Quantification in Python (pyAFQ; <https://yeatmanlab.github.io/pyAFQ>). Given dMRI data that has undergone standard preprocessing (e.g., using QSIprep (26)), pyAFQ automatically performs tractography, classifies streamlines into bundles representing the major tracts, and extracts tract profiles of diffusion properties along those bundles, producing “tidy” CSV output files that are amenable to further statistical analysis (Fig. S1). The library implements the major functionality provided by a previous MATLAB implementation of tractometry analysis (9), and offers a menu of configurable algorithms allowing researchers to tune the pipeline to their specific scientific questions (Fig. S2). Second, we use pyAFQ to assess test-retest reliability of tractometry results. Third, we assess robustness of tractometry results to variations across different models of the diffusion in individual voxels, across different bundle recognition approaches, and across different implementations.

## Materials and Methods

**pyAFQ.** We developed an open-source tractometry software library to support computational reproducibility: Python Automated Fiber Quantification (pyAFQ; <https://github.com/yeatmanlab/pyAFQ>). The software relies heavily on methods implemented in DIPY (28). Our implementation was also guided by a previous MATLAB implementation of tractometry (mAFQ) (9). More details are available in the ‘Automated Fiber Quantification in Python (pyAFQ)’ section of Supplementary Methods.

**Tractometry.** The pyAFQ software is configurable, allowing users to specify methods and parameters for different stages of the analysis (Fig. S2). Here, we will describe the default setting. In the first step, computational tractography methods, implemented in DIPY (28), are used to generate streamlines throughout the brain white matter (Fig. S1A). Next, the T1-weighted MNI template (29, 30) is registered to the anisotropic power map (APM) (31, 32) computed from the diffusion data, that has a T1-like contrast (Fig. S1B) using the symmetric image normalization method (33) implemented in DIPY (28). The next step is to perform bundle recognition, where each tractography streamline is classified as either belonging to a particular bundle, or discarded. We use the transform found during registration to bring canonical anatomical landmarks, such as waypoint regions of interest (ROIs) and probability maps, from template space to the individual subject’s native space. Waypoint ROIs are used to delineate the trajectory of the bundles (34). See Table S1 for the bundle abbreviations we use in this paper. Streamlines that pass through inclusion waypoint ROIs for a particular bundle, and do not pass through exclusion ROI, are selected as candidates to include

in the bundle. In addition, a probabilistic atlas (35) is used as a tie-breaker to determine whether a streamline is more likely to belong to one bundle or another (in cases where the streamline matches the criteria for inclusion in either). For example, the corticospinal tract is identified by finding streamlines that do pass through an axial waypoint ROI in the brainstem and another ROI axially oriented in the white matter of the corona radiata, but that do not pass through the midline (Fig. S1C). The final step is to extract the tract profile: each streamline is resampled to a fixed number of points and the mean value of a diffusion-derived scalar (e.g., fractional anisotropy (FA) and mean diffusivity (MD)) is found for each one of these nodes. The values are summarized by weighting the contribution of each streamline, based on how concordant the trajectory of this streamline is with respect to the other streamlines in the bundle (Fig. S1D). To make sure that profiles represent properties of the core white matter, we remove the first and last 5 nodes of the profile, then further remove any nodes where either the FA is less than 0.2 or the MD is greater than 0.002. This removes nodes that contain partial volume artifacts (16).

**Data.** We used two datasets with test-retest measurements. We used Human Connectome Project test-retest measurements of dMRI for 44 neurologically healthy subjects aged 22-35 (HCP-TR) (36). The other is an experimental dataset, with dMRI from 48 children, 5 years old in age, collected at the University of Washington (UW-PREK). More details about the measurement are available in the ‘Data’ section of Supplementary Methods.

**HCP-TR Configurations.** We processed HCP-TR with three different pyAFQ configurations. In the first configuration, we used the diffusion kurtosis model (DKI) as the orientation distribution function (ODF) model. In the second configuration, we used constrained spherical deconvolution (CSD) as the ODF model. For the final configuration, we used RecoBundles (8) for bundle recognition instead of the default waypoint ROI approach, and DKI as the ODF model. More details are available in the ‘Configurations’ section of Supplementary Methods.

**Measures of Reliability.** Tract recognition of each bundle was compared across measurements and methods using the Dice coefficient, weighted by streamline count (wDSC) (37). Tract profiles were compared with three measures: (1) Profile reliability: mean intraclass correlation coefficient (ICC) across points in different tract profiles for different data, which quantifies the *agreement* of tract profiles (38, 39); (2) Subject reliability: Spearman’s rank correlation coefficient (Spearman’s  $\rho$ ) between the mean of the tract profiles across individuals, which quantifies the *consistency* of the mean of tract profiles; (3) an adjusted contrast index profile (ACIP) to directly compare the values of individual nodes in the tract profiles in different measurements. To estimate test-retest reliability (TRR), the above measures were calculated for each individual across different measurements. To estimate robustness, these were calculated for each individual across different analysis methods. For example, if we calculate the

164 subject reliability across analysis methods, we would call 219  
 165 that “subject robustness”. If we calculated subject reliability 220  
 166 across measurements, we would call that “subject TRR”. We 221  
 167 explain profile and subject reliability in more detail below; 222  
 168 we explain wDSC and ACIP in more detail in the ‘Measures  
 169 of Reliability’ section of Supplementary Methods 223

224  
 225  
 226  
 227  
 228  
 229  
 230  
 231  
 232  
 233  
 234  
 235  
 236  
**Profile reliability.** We use profile reliability to compare the  
 shapes of profiles per bundle and per scalar. Given two sets  
 of data (either test-retest or from different analyses), we first  
 calculate the ICC between tract profiles for each subject in  
 a given bundle and scalar. Then, we take the mean of those  
 correlations. We do this for every bundle and for every scalar.  
 We call this profile reliability because larger differences in  
 the overall values along the profiles will result in a smaller  
 mean of the ICC. Consistent profile shapes are important for  
 distinguishing bundles. Profile reliability provides an assess-  
 ment of the overall reliability of the tract profiles, summariz-  
 ing over the full length of the bundle, for a particular scalar.  
 We calculate the 95% confidence interval on profile reliabili-  
 ties using the standard error of the measurement.

184 In some cases, there is low between-subject variance in  
 185 tract profile shape (for example, this is often the case in  
 186 CST). We use ICC to account for this, as ICC will penal-  
 187 ize low between-subject variance in addition to rewarding  
 188 high within-subject variance. Profile reliability is a way of  
 189 quantifying the *agreement* between profiles. Qualitatively,  
 190 we use four descriptions for profile reliability: excellent (ICC  
 191 > 0.75), good (ICC = 0.60 to 0.74), fair (ICC = 0.40 to 0.59),  
 192 and poor (ICC < 0.40) (40).

193  
 194  
 195  
 196  
 197  
 198  
 199  
 200  
 201  
 202  
 203  
**Subject reliability.** We calculate subject reliability to compare  
 individual differences in profiles, per bundle and per scalar,  
 following (41). Given two measurements for each subject,  
 we first take the mean of each profile within each individ-  
 ual, measurement and scalar. Then we calculate Spearman’s  
 $\rho$  from the means from different subjects for a given bundle  
 and scalar across the measurements. High subject reliabil-  
 ity means the ordering of an individual’s tract profile mean  
 among other individuals is consistent across measurements  
 or methods. This is akin to test reliability which is computed  
 for any clinical measure.

204 One downside of subject reliability is that the shape of the  
 205 extracted profile is not considered. Additionally, if one mea-  
 206 surement or method produces higher values for all subjects  
 207 uniformly, subject reliability would not be affected. Instead,  
 208 the intent of subject reliability is to well summarize the  
 209 preservation of relative differences between individuals for  
 210 mean tract profiles. In other words, subject reliability quan-  
 211 tifies the *consistency* of mean profiles. The 95% confidence  
 212 interval on subject reliabilities are parametric.

## 213 Results

214 Tractometry using pyAFQ classifies streamlines into bundles 242  
 215 that represent major anatomical pathways. The streamlines 243  
 216 are used to sample dMRI-derived scalars into bundle profiles  
 217 that are calculated for every individual and can be summa- 244  
 218 rized for a group of subjects. An example of the process and 245

result of the tract profile extraction process is shown in Sup-  
 plementary Fig. S3, together with the results of this process  
 across the 18 major white matter pathways for all subjects in  
 the HCP-TR dataset.

**Assessing test-retest reliability of tractometry.** In  
 datasets with scan-rescan data we can assess test-retest reli-  
 ability (TRR) at several different levels of tractometry. For ex-  
 ample, the correlation between two profiles provides a mea-  
 sure of the reliability of the overall tract profile in that sub-  
 ject. Analyzing the Human Connectome Project’s test-retest  
 dataset (HCP-TR), we find that for fractional anisotropy (FA)  
 calculated using DKI, the values of *profile reliability* vary  
 across subjects (Figure 1A), but they overall tend to be rather  
 high, with the average value within each bundle in the range  
 $0.77 \pm 0.05$  to  $0.92 \pm 0.02$  and a median across bundles of  
 $0.86$  (Figure 1B). We find similar results for mean diffusivity  
 (MD; Fig. S4) and replicate similar results in a second dataset  
 (Fig. 3B).

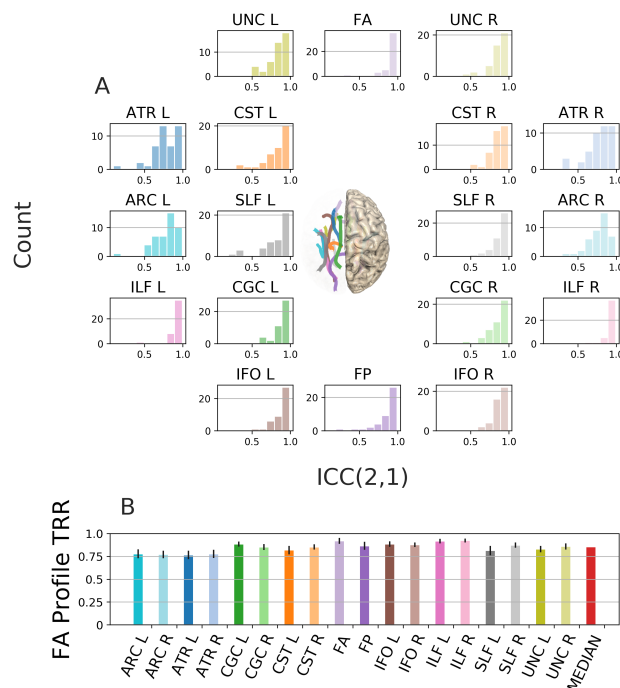

**Fig. 1. FA profile test-retest reliability** A: Histograms of individual subject ICC between the FA tract profiles across sessions for a given bundle. Colors encode the bundles, matching the diagram showing the rough anatomical positions of the bundles for the left side of the brain (center). B: Mean ( $\pm$  95% confidence interval) TRR for each bundle, color-coded to match the histograms and the bundles diagram, with median across bundles in red.

*Subject reliability* assesses the reliability of mean tract profiles across individuals. Subject FA TRR in the HCP-TR also tends to be high, but the values vary more across bundles with a range of  $0.57 \pm 0.24$  to  $0.85 \pm 0.12$  and a median across bundles of 0.73. We can see that subject TRR is lower than profile TRR (Figure 2). This trend is consistent for MD (Fig. S5) as well as for another dataset (Fig. 3C).

**Test-retest reliability of tractometry in different implementations, datasets, and tractography methods.** We



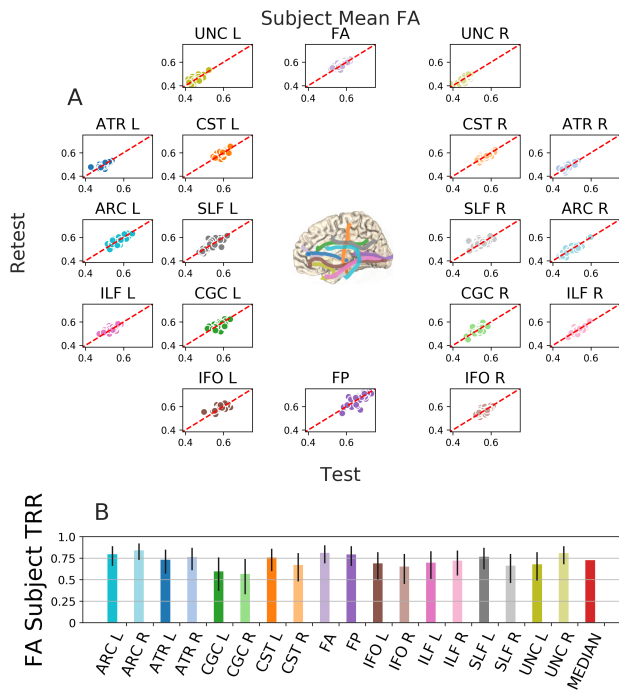

**Fig. 2. Subject test-retest reliability** **A:** Mean tract profiles for a given bundle and the FA scalar for each subject using the first and second session of HCP-TR. Colors encode bundle information, matching the core of the bundles (center). **B:** subject reliability is calculated from the Spearman's  $\rho$  of these distributions, with median across bundles in red ( $\pm$  95% confidence interval).

246 compared TRR across datasets and implementations. In both  
 247 datasets, we found high TRR in the results of tractography  
 248 and bundle recognition: wDSC was larger than 0.7 for all  
 249 but one bundle (Fig. 3A): the delineation of the anterior  
 250 forceps (FA bundle) seems relatively unreliable using pyAFQ  
 251 in the UW-PREK dataset (using the FA scalar, pyAFQ  
 252 subject TRR is only  $0.37 \pm 0.28$  compared to mAFQ's  $0.84 \pm$   
 253  $0.10$ ). We found overall high profile TRR that did not always  
 254 translate to high subject TRR (Fig. 3B-G). For example, for  
 255 FA in UW-PREK, median profile TRRs are 0.75 for pyAFQ  
 256 and 0.77 for mAFQ while median subject TRRs are 0.70 for  
 257 pyAFQ and 0.75 for mAFQ. Note that profile and subject  
 258 TRR have different denominators (for example, subjects that  
 259 have similar mean profiles to each other would have low sub-  
 260 ject TRR, even if the profiles are reliable, because it is harder  
 261 to distinguish between subjects in this case). mAFQ is one of  
 262 the most popular software pipelines currently available for  
 263 tractometry analysis, so it provides an important point for  
 264 comparison. In comparing different software implemen-  
 265 tations, we found that mAFQ has higher subject TRR relative  
 266 to pyAFQ in the UW-PREK dataset, when TRR is relatively  
 267 low for pyAFQ (see the FA bundle, CST L, and ATR L in  
 268 Fig. 3C). On the other hand, in the HCP-TR dataset pyAFQ  
 269 we used the RTP pipeline (42, 43), which is an extension of  
 270 mAFQ, and found that pyAFQ tends to have slightly higher  
 271 profile TRR than RTP for MD, but slightly lower profile TRR  
 272 for FA (Fig. 3D). The pyAFQ and RTP subject TRR are  
 273 highly comparable (Fig. 3E). In FA, the median pyAFQ sub-  
 274 ject TRR for FA is 0.76 while the median RTP subject TRR is

275 0.74. Comparing different ODF models in pyAFQ, we found  
 276 that the DKI and CSD ODF models have highly similar TRR,  
 277 both at the level of wDSC (Fig. 3A), as well as at the level of  
 278 profile and subject TRR (Fig. 3F-G).

**Robustness: comparison between distinct tractogra-  
 phy models and bundles recognition algorithms.** To assess  
 the robustness of tractometry results to different models  
 and algorithms, we used the same measures that were used to  
 calculate TRR.

**Tractometry results can be robust to differences in ODF  
 models used in tractography.** We compared two algorithms:  
 tractography using DKI- and CSD-derived ODFs. The  
 weighted Dice similarity coefficient (wDSC) for this compar-  
 ison can be rather high in some cases (e.g., the uncinate  
 and corticospinal tracts, Figure 4A), but produce results that  
 appear very different for some bundles, such as the arcuate  
 and superior longitudinal fasciculi (ARC and SLF) (see also  
 Figure 4D). Despite these discrepancies, profile and subject  
 robustness are high for most bundles (median FA of 0.77  
 and 0.75, respectively) (Figure 4B,C). In contrast to the re-  
 sults found in TRR, MD subject robustness is consistently  
 higher than FA subject robustness. The two bundles with  
 the most marked differences between the two ODF models  
 are the SLF and ARC (Figure 4D). These bundles have low  
 wDSC and profile robustness, yet their subject robustness re-  
 mains remarkably high (In FA,  $0.75 \pm 0.17$  for ARC R and  
 $0.88 \pm 0.09$  for SLF R) (Figure 4C). These differences are  
 partially explained due to the fact that there are systematic  
 biases in the sampling of white matter by bundles generated  
 with these two ODF models, as demonstrated by the non-  
 zero adjusted contrast index profile (ACIP) between the two  
 models (Figure 4E).

**Most white matter bundles are highly robust across bundle  
 recognition methods.** We compared bundle recognition with  
 the same tractography results using two different approaches:  
 the default waypoint ROI approach (9), and an alternative ap-  
 proach (RecoBundles) that uses atlas templates in the space  
 of the streamlines (44). Between these algorithms, wDSC is  
 around or above 0.6 for all but one bundle, ILF R (Figure 5).  
 There is an asymmetry in the ILF atlas bundle(7), which re-  
 sults in discrepancies between ILF R recognized with way-  
 point ROIs and with RecoBundles. Despite this bundle, we  
 find high robustness overall. For MD, the first quartile subject  
 robustness is 0.82 (Figure 5C, D).

**Tractometry results are robust to differences in software im-  
 plementation.** Overall, we found that robustness of tractom-  
 etry across these different software implementations is high  
 in most white matter bundles. In the mAFQ/pyAFQ compar-  
 ison, most bundles have a wDSC around or above 0.8,  
 except the two callosal bundles (FA bundle and FP), which  
 have a much lower overlap (Fig. 6A). Consistent with this  
 pattern, profile and subject robustness is also overall rather  
 high (Fig. 6B, C). The median values across bundles are 0.71  
 and 0.77 for FA profile and subject robustness, respectively.

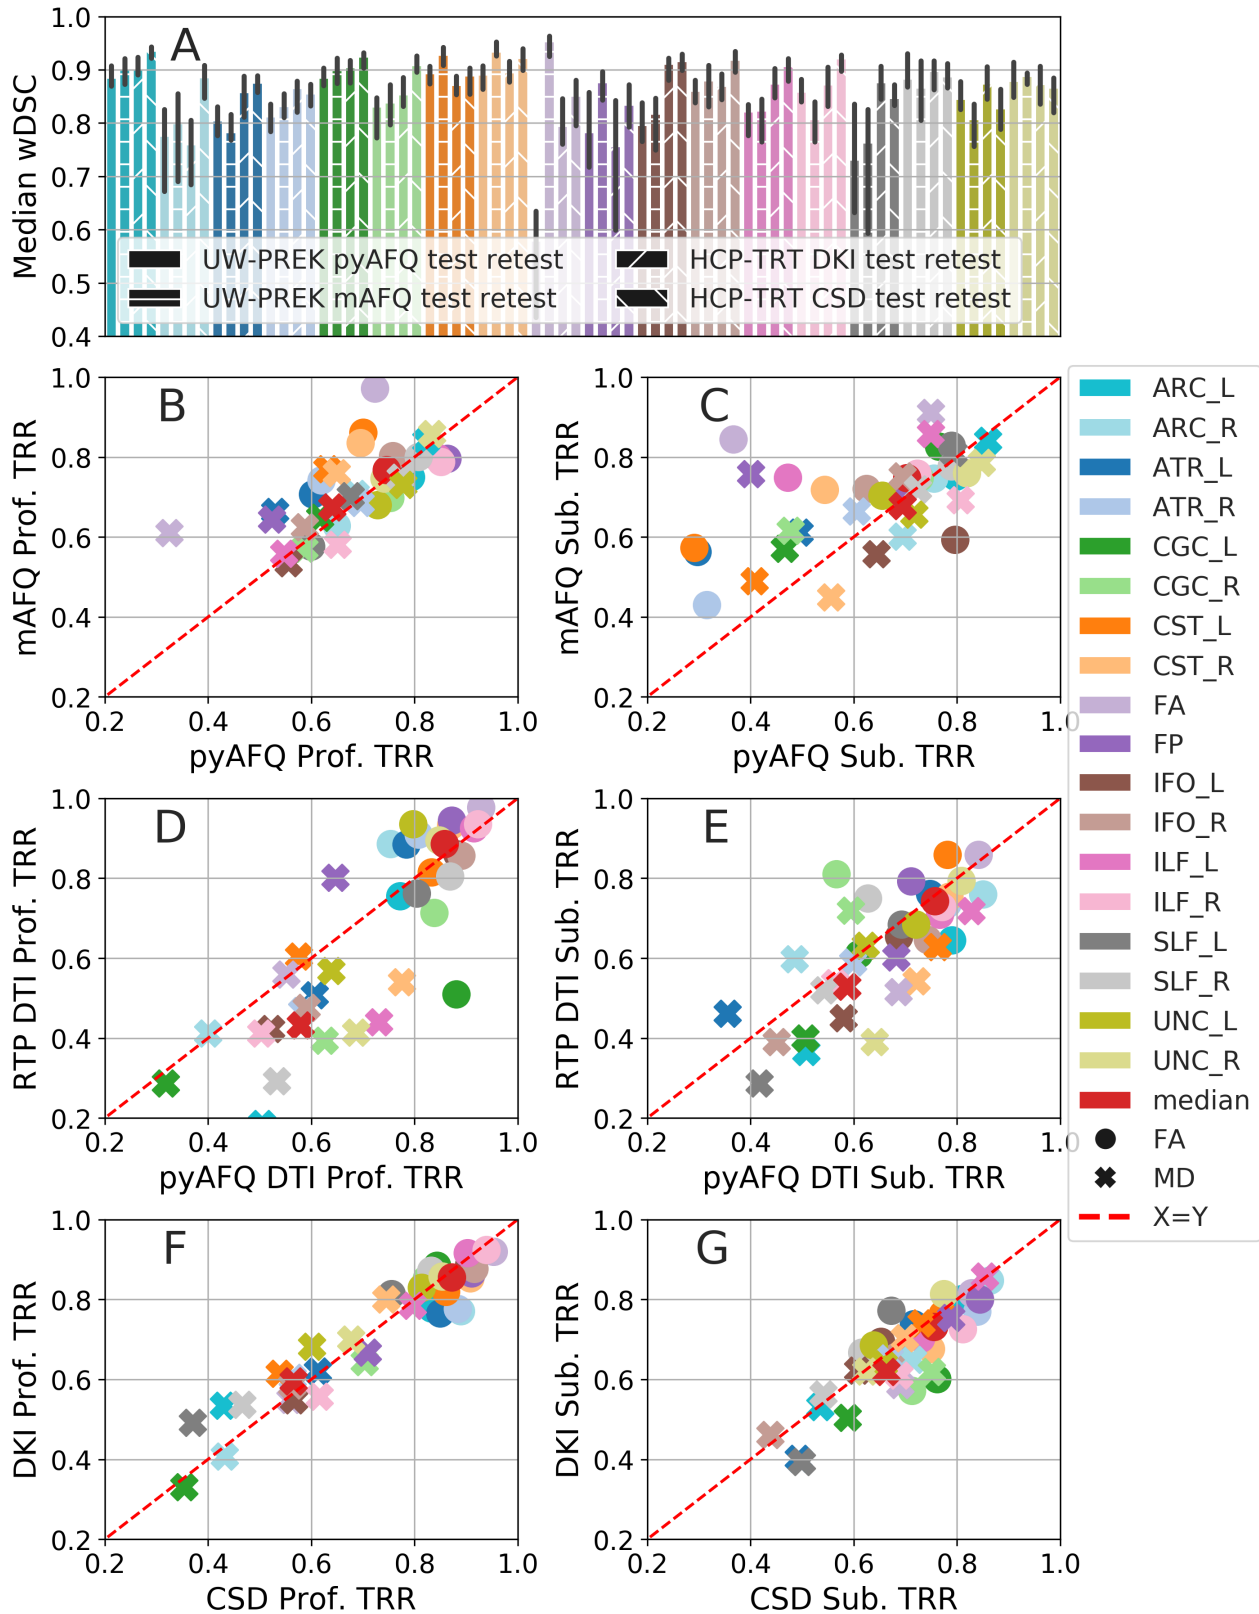

**Fig. 3.** wDSC, profile, and subject TRR of: pyAFQ and mAFQ on UW-PREK; pyAFQ on HCP-TR using different ODF models; and RTP on HCP-TR. Colors indicate bundle. In **A**: texture indicates the dataset and methods being compared. Error bars show the 95% confidence interval. **B**, **D**, and **F** show profile TRR and **C**, **E**, and **G** show subject TRR. Profile and subject TRR calculations are demonstrated with HCP-TR using DKI in figures 1 and 2 respectively. In **B** and **C**, we compare the TRR of mAFQ and pyAFQ on UW-PREK. In **D** and **E**, we compare pyAFQ and RTP on HCP-TR using only single shell data. In **F** and **G**, we compare DKI and CSD TRR on HCP-TR. Point shapes indicate the extracted scalar. The red dotted line is equal TRR between methods.

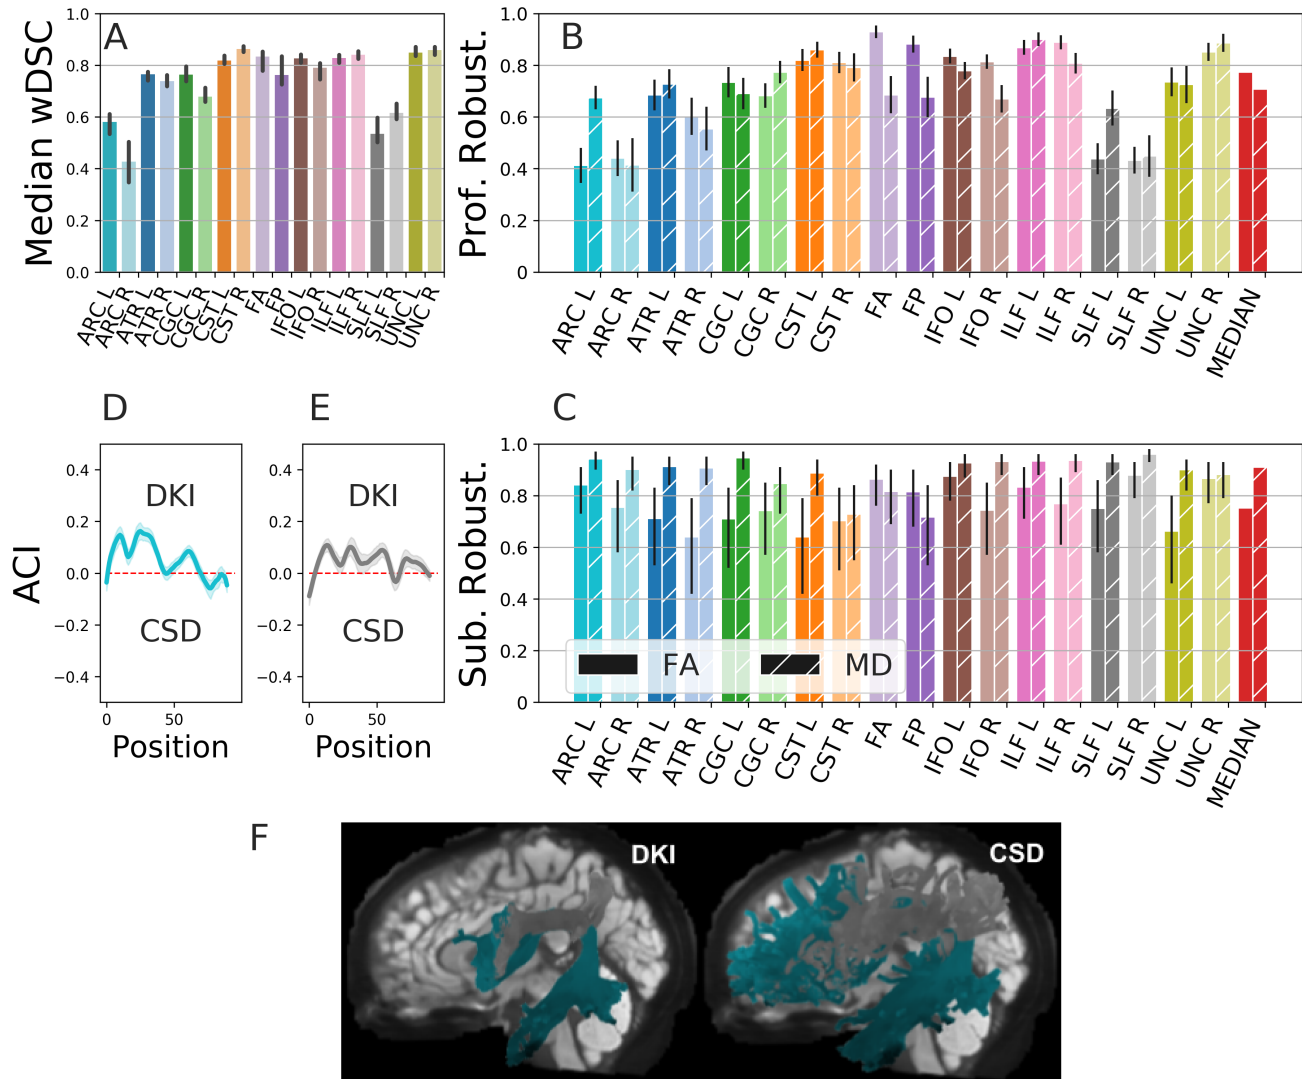

**Fig. 4. ODF model robustness.** We compared DKI- and CSD-derived tractography. Colors encode bundle information as in Figures 1 and 2. Textured hatching encodes FA/MD information. **A** wDSC robustness. **B** Profile robustness. **C** Subject robustness. Error bars represent 95% confidence interval. **D, E** Adjusted contrast index profile (ACIP) between ARC L and SLF L tract profiles of each algorithm. Positive ACI indicates DKI found a higher value of FA than CSD at that node. The 95% confidence interval on the mean is shaded. **F** Tractography and bundle recognition results for ARC L and SLF L respectively for one example subject.

329 For some bundles, like the right and left uncinate, there is 346  
 330 large agreement between pyAFQ and mAFQ (for subject FA: 347  
 331 UNC L  $\rho = 0.90 \pm 0.07$ , UNC R  $\rho = 0.89 \pm 0.08$ ). How-  
 332 ever, the callosal bundles have particularly low mean diffu- 348  
 333 sivity (MD) profile robustness (Fig. 6B) ( $0.07 \pm 0.09$  for FP,  
 334  $0.18 \pm 0.09$  for FA).

335 The robustness of tractometry to the differences between the 351  
 336 pyAFQ and mAFQ implementation depends on the bundle, 352  
 337 scalar, and reliability metric. In addition, for many bundles, 353  
 338 the ACIP between mAFQ and pyAFQ results is very close 354  
 339 to 0, indicating no systematic differences (Fig. 6D). In some 355  
 340 bundles – the corticospinal tract (CST) and the anterior thala- 356  
 341 mic radiations (ATR) – there are small systematic differences 357  
 342 between mAFQ and pyAFQ. In the Forceps Posterior (FP), 358  
 343 pyAFQ consistently finds smaller FA values than mAFQ in a 359  
 344 section on the left side. Notice that the forceps anterior has 360  
 345 an ACIP that deviates only slightly from 0, even though the 361

forceps recognitions did not have as much overlap as other bundle recognitions (see Fig. 6A).

## Discussion

349 Previous work has called into question the the reliability  
 350 of neuroimaging analysis (e.g., (25, 45, 46)). We assessed  
 the reliability of a specific approach, tractometry, which  
 is grounded in decades of anatomical knowledge, and we  
 demonstrate that this approach is reproducible, reliable and  
 robust. A tractometry analysis typically combines the out-  
 puts of tractography with diffusion reconstruction at the level  
 of the individual voxels within each bundle. One of the major  
 challenges facing researchers who use tractometry is that  
 there are many ways to analyze diffusion data, including dif-  
 ferent models of diffusion at the level of individual voxels;  
 techniques to connect voxels through tractography; and ap-  
 proaches to classify tractography results into major white

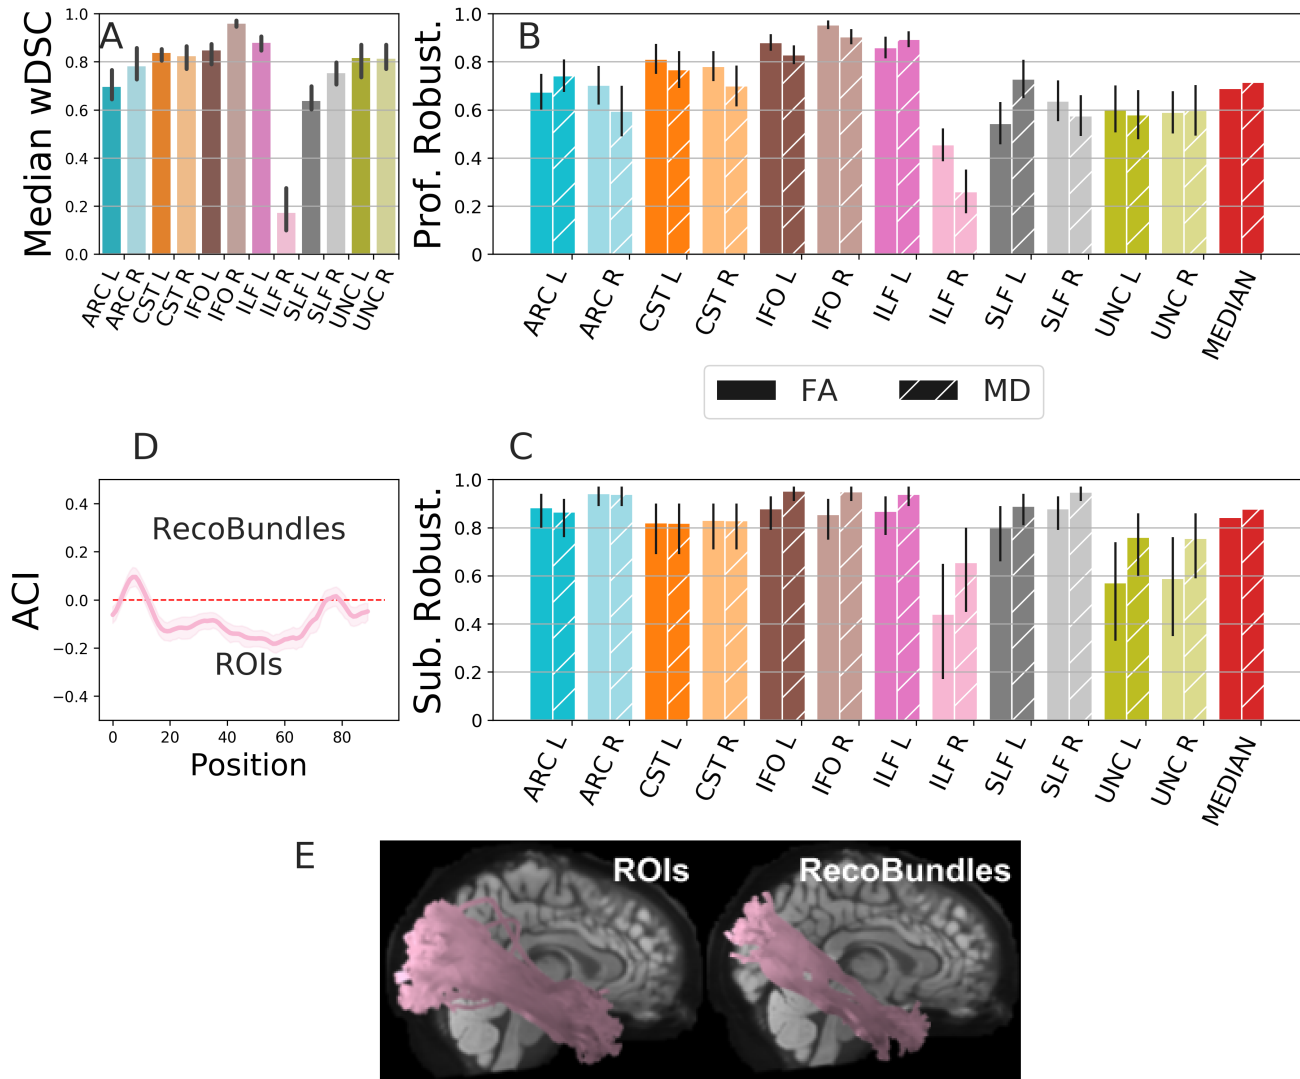

**Fig. 5. Recognition algorithm robustness.** **A** wDSC. **B** Profile robustness. **C** Subject robustness. Error bars show the 95% confidence interval. **D** The ILF R FA ACIP, where positive ACI indicates RecoBundles found a higher value of FA than the waypoint ROIs approach at that node. **E** shows the ILF R found by each algorithm for an example subject.

362 matter bundles. Here, we analyzed the reliability of tractome- 379  
 363 try analysis at several different levels. We analyzed both test- 380  
 364 retest reliability of tractometry results and their robustness to 381  
 365 changes in analytic details, such as choice of tractography 382  
 366 method, bundle recognition algorithm, and software imple- 383  
 367 mentation (Fig 6).

368 **Test-retest reliability of tractometry.** Test-retest reliabil- 386  
 369 ity (TRR) of tractometry is usually rather high, comparable 387  
 370 in some tracts and measurements to the TRR of the measure- 388  
 371 ment. In comparing the HCP-TR analysis and UW-PREK 389  
 372 analysis, we note that higher measurement reliability goes 390  
 373 hand in hand with tractometry reliability. 391

374 In terms of the anatomical definitions of the bundles, quan- 392  
 375 tified as the TRR wDSC, we find reliable results in both 393  
 376 datasets and with both software implementations and both 394  
 377 tractography methods that we tested. With pyAFQ we found 395  
 378 a relatively low TRR in the frontal callosal bundle (FA bun- 396

379 dle) in the UW-PREK dataset. This could be due to the sen- 380  
 381 sitivity of the definition of this bundle to susceptibility dis- 382  
 383 tortion artifacts in the frontal poles of the two hemispheres. 384  
 385 This low TRR was not found with mAFQ, suggesting that 386  
 387 this low TRR is not a necessary feature of the analysis, and is 388  
 389 a potential avenue for improvement to pyAFQ. While the two 390  
 391 implementations were created by teams with partial overlap 392  
 393 and despite the fact that pyAFQ implementation drew both 394  
 395 inspiration as well as specific implementation details from 396  
 397 mAFQ, many details of implementation still differ substan- 398  
 399 tially. For example, the implementations of tractography al- 400  
 401 gorithms are quite different – pyAFQ relies on DIPY (28) 402  
 403 for its tractography, while mAFQ uses implementations pro- 404  
 405 vided in Vistasoft (47). The two pipelines also use differ- 406  
 407 ent registration algorithms, with pyAFQ relying on the SyN 408  
 409 algorithm (33), while mAFQ relies on registration methods 410  
 411 implemented as part of the Statistical Parametric Mapping 412  
 413 (SPM) software (48). These differences may explain the dis-

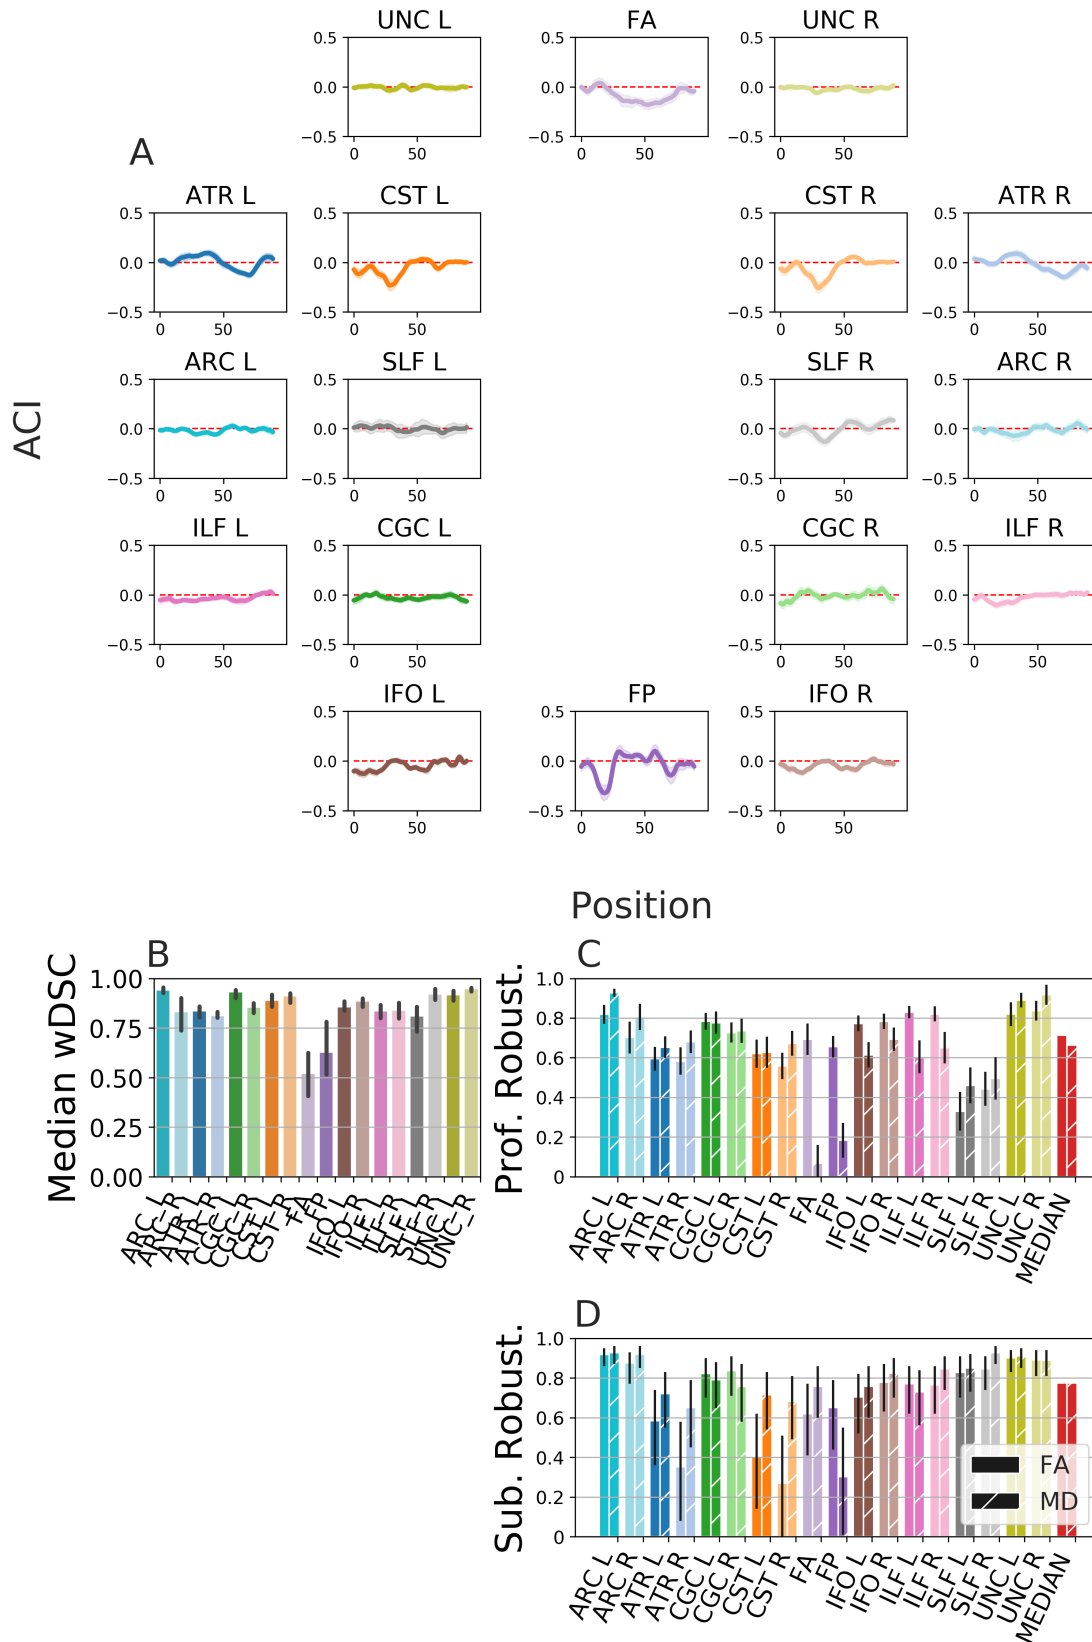

**Fig. 6. Robustness between pyAFQ and mAFQ on UW-PREK session # 1 data.** **A** ACIP between the FA tract profiles from UW-PREK using pyAFQ and mAFQ. Positive ACI indicates pyAFQ found a higher value than mAFQ at that node. The 95% confidence interval on the mean is shaded. Robustness in wDSC (**B**) bundle profiles (**C**) and across subjects (**D**). Error bars show the 95% confidence interval.



397 discrepancies observed. 453  
398 We also find that TRR is high at the level of profiles within 454  
399 subjects and mean tract profiles across subjects. This is gen- 455  
400 erally observed in both datasets that we examined, and us- 456  
401 ing different analysis methods and software implementations. 457  
402 For the UW-PREK dataset, subject TRR tends to be higher 458  
403 in mAFQ than in pyAFQ. On the other hand, for the HCP- 459  
404 TR dataset, pyAFQ subject TRR tends to be higher than that 460  
405 obtained with RTP, which is a fork and extension of mAFQ 461  
406 (42, 43). Generally, TRR of FA profiles and also TRR of 462  
407 mean FA across subjects tend to be higher than those of MD. 463  
408 This could be because the assessment of MD is more sensi- 464  
409 tive to partial volume effects. In contrast to FA, MD is also 465  
410 not bounded, which means that extreme values at the bound- 466  
411 aries of tissue types can have a substantial effect on TRR. 467

412 **Robustness of tractometry.** As highlighted in the recent 468  
413 work by Botvinik-Nezer *et al* (25) and in parallel by Schilling 469  
414 *et al* (45), inferences from even a single dataset can vary sig- 470  
415 nificantly, depending on the decisions and analysis pipelines 471  
416 that are used. The analysis approaches used in tractometry 472  
417 embody many assumptions made at the different stages of 473  
418 analysis: the model of the signal in each individual voxel, the 474  
419 manner in which streamlines are generated in tractography, 475  
420 the definition of bundles, and the extraction of tract profiles. 476  
421 While TRR is important, it does not guard against systematic 477  
422 errors in the analysis approach. One way to test model as- 478  
423 sumptions and software failures is to create ground truth data 479  
424 against which different methods and implementations can be 480  
425 tested (13, 49, 50). However, this approach also relies on 481  
426 certain assumptions about the mechanisms that generate the 482  
427 data that is considered ground truth, making this approach 483  
428 more straightforward for some methods than others. Here, 484  
429 we instead assessed the robustness of tractometry results to 485  
430 perturbations of analytic components, focusing on the mod- 486  
431 elling of ODFs in individual voxels and the approach taken 487  
432 to bundle recognition. 488  
489

433 **Subject robustness remains high despite differences in the 490**  
434 **spatial extent of bundles.** We replicated previous findings 491  
435 that the definition of major bundles can vary in terms of their 492  
436 spatial extent (quantified via wDSC) (13, 37, 40, 45), depend- 493  
437 ing on the software implementation or the ODF model used. 494  
438 As we show, low wDSC robustness often corresponds to low 495  
439 profile robustness, and vice versa (Fig 6B,C, Fig 4A,B, and 496  
440 Fig 5A,B). That is, when two algorithms detect bundles with 497  
441 small spatial overlap, the shape of the resulting tract profiles 498  
442 are also different from each other. However, low wDSC and 499  
443 profile robustness does not always translate to low subject 500  
444 robustness. Algorithms can detect bundles with low spatial 501  
445 overlap and of different shapes yet still agree on the ordering 502  
446 of the mean of the profiles, i.e., which subjects have high or 503  
447 low FA in a given bundle. A clear example of this is the SLF 504  
448 and ARC in Fig 4 (wDSC and profile robustness are low, yet 505  
449 subject robustness is very high). This suggests that tractome- 506  
450 try can overcome failures in precise delineation of the major 507  
451 bundles by averaging tissue properties within the core of the 508  
452 white matter. Conversely, important details that are sensitive 509

to these choices may be missed when averaging along the length of the tracts. Moreover, this may also reflect biases in the measurement that cannot be overcome at either stage of the analysis: tractography or bundle recognition.

Our high subject-level robustness results (Fig 6C, Fig 4C, and Fig 5C) dovetail with the results of a recently-published study that used tractometry in a sample of 45 participants (51), and found high subject-level correlations between the mean tract values of FA and MD for two different pipelines: deterministic tractography using the diffusion tensor model (DTI) as the ODF model (essentially identical to a pipeline used in our supplementary analysis, described in “DTI Configuration”), and probabilistic tractography using CSD as the ODF model. Consistent with our results on the HCP-TR dataset, slightly higher subject robustness was found for MD than for FA.

**Exceptions & Limitations.** High profile robustness did not always imply high subject robustness (e.g., the FP in Fig 4 has high profile robustness, but low subject robustness). This suggests that there are other sources of between-subject variance that do not correspond directly to profile robustness within an individual.

There are still significant challenges to robustness that arise from the way in which the major bundles are defined. This problem was highlighted in recent work that demonstrated that different researchers use different criteria to define bundles of streamlines that represent the same tract (45). In our case, this challenge is represented by the relatively low robustness between the waypoint ROI algorithm for bundle definition and the RecoBundles algorithm. In this comparison, the wDSC exceeds 0.8 in only one bundle and is below 0.4 in two cases. While both algorithms identify a bundle of streamlines that represents the right ILF, this bundle differs substantially between the two algorithms. Even so, profile and subject robustness can still be rather high, even in some cases in which rather middling overlap is found between the anatomical extent of the bundles. This challenge highlights the need for more precise definitions of the models of brain tracts that are derived from dMRI, but also highlights the need for clear, automated and reproducible software to perform bundle recognition.

In addition to decisions about analysis approach, which may be theoretically motivated, software implementations may contain systematic errors in executing the different steps and different software may be prone to different kinds of failure modes. Since other software implementations (9, 42) of the AFQ approach have been in widespread use in multiple different datasets and research settings, we also compared the results across different software implementations (Fig. 6). While there are some systematic differences between implementations, tractometry is overall quite robust to differences between software implementations.

Another important limitation of this work is that we have only analyzed samples of healthy individuals. Where brains are severely deformed (e.g., in TBI, brain tumors and so forth), particular care would be needed to check the results of bundle recognition, and separate considerations would be needed in order to reach conclusions about the reliability of the infer-

ences made.

**Computational reproducibility via open-source software.** Reproducibility is a bedrock of science, but achieving full computational reproducibility is a high bar that requires access to the software, data and computational environment that a researcher uses (22). One of the goals of pyAFQ is to provide a platform for reproducible tractometry. It is embedded in an ecosystem of tools for reproducible neuroimaging and is extensible. This is shown in Fig. S6 and Fig S2 and is further discussed in “Supplementary Discussion of pyAFQ”. Results from the present article and supplements can be reproduced using a set of Jupyter notebooks provided here: [https://github.com/36000/Tractometry\\_TRR\\_and\\_robustness](https://github.com/36000/Tractometry_TRR_and_robustness). After installing the version of pyAFQ that we used (0.6), reproduction should be straightforward on standard operating systems and architectures, or in cloud computing systems (see code and Supplementary Methods). In the UW-PREK dataset, we shared the tract profiles and we provide web-based visualizations using a tool that previously developed for transparent data sharing of tractometry data (52): [https://yeatmanlab.github.io/UW\\_PREK\\_pyAFQ\\_pre\\_browser](https://yeatmanlab.github.io/UW_PREK_pyAFQ_pre_browser) and [https://yeatmanlab.github.io/UW\\_PREK\\_pyAFQ\\_post\\_browser](https://yeatmanlab.github.io/UW_PREK_pyAFQ_post_browser).

The HCP-TR dataset is relatively straightforward for others to access in its preprocessed form through the HCP, and because the study IDs can be openly shared in our code, anyone with such access should be able to reproduce the figures in full. Using these resources, it should be possible to re-execute our workflows and replicate most of our results (53). For example, if other researchers would be interested in comparing our TRR results to another tractometry pipeline (e.g., TRACULA (11), another popular tractometry pipeline) or another bundle recognition algorithm (e.g., TractSeg (54), which uses a neural network to recognize bundles, or Classifyer (55), which uses a linear classifier), they could do so with the HCP-TR dataset, inspired by our scripts, and the visualization tools in the pyAFQ software.

**Future Work.** There are many aspects of reliability that could be further explored. We explored robustness with respect to ODF models and bundle recognition algorithms; robustness could also be explored with respect to: data acquisition parameters within the same subject; preprocessing methods; profile extraction method (for example, comparing our current approach with the BUndle ANalytics (BUAN) (56)); and the effects of profile realignment on tract profile reliability (57). Another possibility for teasing apart measurement and tractography effects would be to test profile TRR using the streamline of one scan on the results of the second scan (by registering the streamline themselves, to avoid data interpolation in volume registration). This could tease apart the effects of tractography from the voxel-level models of tissue properties, because it is not necessary that these would be sensitive to the same constraints (e.g., different sensitivity to noise). The methods we demonstrate and resources we

provide in this paper should be useful for anyone wishing to further explore reliability in tractometry.

## ACKNOWLEDGEMENTS

This work was supported through grant 1RF1MH121868-01 from the National Institute of Mental Health/The BRAIN Initiative, through grant 5R01EB027585-02 to Eleftherios Garyfallidis (Indiana University) from the National Institute of Biomedical Imaging and Bioengineering and through Azure Cloud Computing Credits for Research & Teaching provided through University of Washington Research Computing and the University of Washington eScience Institute. We are also grateful for support from the Gordon & Betty Moore Foundation and the Alfred P. Sloan Foundation to the University of Washington eScience Institute Data Science Environment, as well as support from the Washington Research Foundation to the eScience Institute and to the University of Washington Institute for Neuroengineering. Thanks to Andreas Neef for feedback on the pyAFQ software. Data were provided in part by the Human Connectome Project, WU-Minn Consortium (Principal Investigators: David Van Essen and Kamil Ugurbil; 1U54MH091657) funded by the 16 NIH Institutes and Centers that support the NIH Blueprint for Neuroscience Research; and by the McDonnell Center for Systems Neuroscience at Washington University.

## Bibliography

1. Steven E Petersen and Olaf Sporns. Brain Networks and Cognitive Architectures. *Neuron*, 88(1):207–219, October 2015. Publisher: Elsevier.
2. Danielle S Bassett and Olaf Sporns. Network neuroscience. *Nat. Neurosci.*, 20(3):353–364, February 2017.
3. T E Conturo, N F Lori, T S Cull, E Akbudak, A Z Snyder, J S Shimony, R C McKinstry, H Burton, and M E Raichle. Tracking neuronal fiber pathways in the living human brain. *Proc. Natl. Acad. Sci. U. S. A.*, 96(18):10422–10427, August 1999.
4. Susumu Mori and Peter C M Van Zijl. Fiber tracking: principles and strategies—a technical review. *NMR in Biomedicine: An International Journal Devoted to the Development and Application of Magnetic Resonance In Vivo*, 15(7-8):468–480, 2002. Publisher: Wiley Online Library.
5. Setsu Wakana, Hangyi Jiang, Lidia M Nagae-Poetscher, Peter C M van Zijl, and Susumu Mori. Fiber tract-based atlas of human white matter anatomy. *Radiology*, 230(1):77–87, January 2004.
6. Kenichi Oishi, Karl Zilles, Katrin Amunts, Andreia Faria, Hangyi Jiang, Xin Li, Kazi Akhter, Kegang Hua, Roger Woods, Arthur W Toga, G Bruce Pike, Pedro Rosa-Neto, Alan Evans, Jiaqiang Zhang, Hao Huang, Michael I Miller, Peter C M van Zijl, John Mazziotta, and Susumu Mori. Human brain white matter atlas: identification and assignment of common anatomical structures in superficial white matter. *Neuroimage*, 43(3):447–457, November 2008.
7. Fang-Cheng Yeh, Sandip Panesar, David Fernandes, Antonio Meola, Masanori Yoshino, Juan C. Fernandez-Miranda, Jean M. Vettel, and Timothy Verstynen. Population-averaged atlas of the macroscale human structural connectome and its network topology. *Neuroimage*, 178:57–68, 2018. ISSN 1095-9572. doi: 10.1016/j.neuroimage.2018.05.027.
8. Eleftherios Garyfallidis, Marc-Alexandre Côté, Francois Rheault, Jasmeen Sidhu, Janice Hau, Laurent Petit, David Fortin, Stephen Cunanne, and Maxime Descoteaux. Recognition of white matter bundles using local and global streamline-based registration and clustering. *Neuroimage*, July 2017. doi: 10.1016/j.neuroimage.2017.07.015.
9. Jason D. Yeatman, Robert F. Dougherty, Nathaniel J. Myall, Brian A. Wandell, and Heidi M. Feldman. Tract Profiles of White Matter Properties: Automating Fiber-Tract Quantification. *PLOS ONE*, 7(11):e49790, November 2012. ISSN 1932-6203. doi: 10.1371/journal.pone.0049790. Publisher: Public Library of Science.
10. Marco Catani and Michel Thiebaut de Schotten. A diffusion tensor imaging tractography atlas for virtual in vivo dissections. *Cortex*, 44(8):1105–1132, September 2008. Publisher: Elsevier.
11. Anastasia Yendiki, Patricia Panneck, Priti Srinivasan, Allison Stevens, Lilla Zöllei, Jean Augustinack, Ruopeng Wang, David Salat, Stefan Ehrlich, Tim Behrens, Saad Jbabdi, Randy Gollub, and Bruce Fischl. Automated probabilistic reconstruction of white-matter pathways in health and disease using an atlas of the underlying anatomy. *Front. Neuroinform.*, 5:23, October 2011.
12. Demian Wassermann, Nikos Makris, Yogesh Rathi, Martha Shenton, Ron Kikinis, Marek Kubicki, and Carl-Fredrik Westin. The white matter query language: a novel approach for describing human white matter anatomy. *Brain Struct. Funct.*, 221(9):4705–4721, December 2016.
13. Klaus H. Maier-Hein, Peter F. Neher, Jean-Christophe Houde, Marc-Alexandre Côté, Eleftherios Garyfallidis, Jidan Zhong, Maxime Chamberland, Fang-Cheng Yeh, Ying-Chia Lin, Qing Ji, Wilburr E. Reddick, John O. Glass, David Qixiang Chen, Yuanjing Feng, Chengfeng Gao, Ye Wu, Jieyan Ma, Renjie He, Qiang Li, Carl-Fredrik Westin, Samuel Deslauriers-Gauthier, J. Omar Ocegueda González, Michael Paquette, Samuel St-Jean, Gabriel Girard, François Rheault, Jasmeen Sidhu, Chantal M. W. Tax, Fenghua Guo, Hamed Y. Mesri, Szabolcs Pávid, Martijn Froeling, Anneriet M. Heemskerk, Alexander Leemans, Arnaud Boré, Basile Dinsard, Christophe Bedetti, Matthieu Desrosiers, Simona Brambati, Julien Doyon, Alessia Sarica, Roberta Vasta, Antonio Cerasa, Aldo Quattrone, Jason Yeatman, Ali R. Khan, Wes Hodges, Simon Alexander, David Romascano, Muhamed Barakovic, Anna Auria, Oscar Esteban, Alia Lemkaddem, Jean-Philippe Thiran, H. Ertan Cetingul, Benjamin L. Odry, Boris Mailhe, Mariappan S. Nadar, Fabrizio Pizzagalli, Gautam Prasad, Julio E. Villalon-Reina, Justin Galvis, Paul M. Thompson, Francisco De Santiago Requejo, Pedro Luque Laguna, Luis Miguel Lacerda, Rachel Barrett, Flavio Dell’Acqua, Marco Catani, Laurent Petit, Emmanuel Caruyer, Alessandro Daducci, Tim B. Dyrby, Tim Holland-Letz, Claus C. Hilgetag, Bram Stieltjes, and Maxime Descoteaux. The challenge of mapping the human connectome based on diffusion tractography. *Nature Communications*, 8(1):1349,

- 645 November 2017. ISSN 2041-1723. doi: 10.1038/s41467-017-01285-x. Number: 1 Pub- 731  
646 lisher: Nature Publishing Group. 732
- 647 14. Cibu Thomas, Frank Q Ye, M Okan Irfanoglu, Pooja Modi, Kadharbatha S Saleem, David A 733  
648 Leopold, and Carlo Pierpaoli. Anatomical accuracy of brain connections derived from diffu- 734  
649 sion MRI tractography is inherently limited. *Proc. Natl. Acad. Sci. U. S. A.*, 111(46):16574– 735  
650 16579, November 2014. 736
- 651 15. Kurt G Schilling, Laurent Petit, Francois Rheault, Samuel Remedios, Carlo Pierpaoli, 737  
652 Adam W Anderson, Bennett A Landman, and Maxime Descoteaux. Brain connections de- 738  
653 rived from diffusion mri tractography can be highly anatomically accurate—if we know where 739  
654 white matter pathways start, where they end, and where they do not go. *Brain Structure and* 740  
655 *Function*, 225(8):2387–2402, 2020. 741
- 656 16. Ariel Rokem, Jason D. Yeatman, Franco Pestilli, Kendrick N. Kay, Aviv Mezer, Stefan van der 742  
657 Walt, and Brian A. Wandell. Evaluating the Accuracy of Diffusion MRI Models in White 743  
658 Matter. *PLOS ONE*, 10(4):e0123272, April 2015. ISSN 1932-6203. doi: 10.1371/journal. 744  
659 pone.0123272. Publisher: Public Library of Science. 745
- 660 17. Dmitry S Novikov, Valerij G Kiselev, and Sune N Jespersen. On modeling. *Magn. Reson.* 746  
661 *Med.*, 79(6):3172–3193, June 2018. 747
- 662 18. Derek K Jones, Adam R Travis, Greg Eden, Carlo Pierpaoli, and Peter J Basser. PASTA: A 748  
663 pointwise assessment of streamline tractography attributes. *Magn. Reson. Med.*, 53(6): 749  
664 1462–1467, June 2005. 750
- 665 19. John B Colby, Lindsay Soderberg, Catherine Lebel, Ivo D Dinov, Paul M Thompson, and 751  
666 Elizabeth R Sowell. Along-tract statistics allow for enhanced tractography analysis. *Neu-* 752  
667 *roimage*, 59(4):3227–3242, February 2012. 753
- 668 20. Adam Richie-Halford, Jason Yeatman, Noah Simon, and Ariel Rokem. Multidimensional 754  
669 analysis and detection of informative features in diffusion MRI measurements of human 755  
670 white matter. *PLoS Computational Biology*, in press, 2021. doi: [https://doi.org/10.1371/](https://doi.org/10.1371/journal.pcbi.1009136) 756  
671 [journal.pcbi.1009136](https://doi.org/10.1371/journal.pcbi.1009136). 757
- 672 21. Michael Dayan, Elizabeth Monohan, Sneha Pandya, Amy Kuceyeski, Thanh D Nguyen, 758  
673 Ashish Raj, and Susan A Gauthier. Profilmetry: A new statistical framework for the char- 759  
674 acterization of white matter pathways, with application to multiple sclerosis. *Hum. Brain* 760  
675 *Mapp.*, December 2015. 761
- 676 22. David L Donoho. An invitation to reproducible computational research. *Biostatistics*, 11(3): 762  
677 385–388, July 2010. 763
- 678 23. Peter Ivić and Douglas Thain. Reproducibility in Scientific Computing. *ACM Comput. Surv.*, 764  
679 51(3):1–36, July 2018. Place: New York, NY, USA Publisher: Association for Computing 765  
680 Machinery. 766
- 681 24. The Turing Way Community, Becky Arnold, Louise Bowler, Sarah Gibson, Patricia Herterich, 767  
682 Rosie Higman, Anna Krystallidi, Alexander Morley, Martin O'Reilly, and Kirstie Whitaker. *The* 768  
683 *Turing Way: A Handbook for Reproducible Data Science*. March 2019. 769
- 684 25. Rotem Botvinnik-Nezer, Felix Holzmeister, Colin F. Camerer, Anna Dreber, Juergen Huber, 770  
685 Magnus Johannesson, Michael Kircher, Roni Iwanir, Jeanette A. Mumford, R. Alison Ad- 771  
686 cock, Paolo Avesani, Blazej M. Baczkowski, Aahana Bajracharya, Leah Bakst, Sheryl Ball, 772  
687 Marco Barilari, Nadège Bault, Derek Beaton, Julia Beintner, Roland G. Benoit, Ruud M. W. J. 773  
688 Berkers, Jamil P. Bhanji, Bharat B. Biswal, Sebastian Bobadilla-Suarez, Tiago Bortolini, 774  
689 Katherine L. Bottenhorn, Alexander Bowring, Senne Braem, Hayley R. Brooks, Emily G. 775  
690 Brudner, Cristian B. Calderon, Julia A. Camilleri, Jaime J. Castellon, Luca Cecchetti, 776  
691 Edna C. Cieslik, Zachary J. Cole, Olivier Collignon, Robert W. Cox, William A. Cunningham, 777  
692 Stefan Czoschke, Kamalaker Dadi, Charles P. Davis, Alberto De Luca, Mauricio R. Del- 778  
693 gado, Lysia Demetriou, Jeffrey B. Dennison, Xin Di, Erin W. Dickie, Ekaterina Dobryakova, 779  
694 Claire L. Donnat, Juergen Funkert, Niall W. Duncan, Joke Durnez, Amr Ed, Simon B. Eick- 780  
695 hoff, Andrew Erhart, Laura Fontanesi, G. Matthew Fricke, Shiguang Fu, Adriana Galván, 781  
696 Remi Gau, Sarah Genon, Tristan Glatar, Enrico Glerean, Jelle J. Goeman, Sergej A. E. 782  
697 Golowin, Carlos González-García, Krzysztof J. Gorgolewski, Cheryl L. Grady, Mikella A. 783  
698 Green, João F. Guassi Moreira, Olivia Guest, Shabnam Hakimi, J. Paul Hamilton, Roeland 784  
699 Hancock, Giacomo Handjaras, Bronson B. Harry, Colin Hawco, Peer Herholz, Gabrielle 785  
700 Herman, Stephan Heunis, Felix Hoffstaedter, Jeremy Hogeveen, Susan Holmes, Chuan- 786  
701 Peng Hu, Scott A. Huettel, Matthew E. Hughes, Vittorio Iacovella, Alexandru D. Iordan, 787  
702 Peder M. Isager, Ayse I. Isik, Andrew Jahn, Matthew R. Johnson, Tom Johnstone, Michael 788  
703 J. E. Joseph, Anthony C. Juliano, Joseph W. Kable, Michalis Kassinosopoulos, Cemal Koba, 789  
704 Xiang-Zhen Kong, Timothy R. Kosciak, Nuri Erkut Kucukboyaci, Brice A. Kuhl, Sebastian 790  
705 Kupek, Angela R. Laird, Claus Lamm, Robert Langner, Nina Lauharatanahirun, Hongmi 791  
706 Lee, Sangil Lee, Alexander Leemans, Andrea Leo, Elise Lesage, Flora Li, Monica Y. C. 792  
707 Li, Phui Cheng Lim, Evan N. Lintz, Schuyler W. Liphardt, Annabel B. Losecaat Vermeer, 793  
708 Bradley C. Love, Michael L. Mack, Norberto Malpica, Theo Marins, Camille Maumet, Kelsey 794  
709 McDonald, Joseph T. McGuire, Helena Melero, Adriana S. Méndez Leal, Benjamin Meyer, 795  
710 Kristin N. Meyer, Glad Mihai, Georgios D. Mitsis, Jorge Moll, Dylan M. Nielson, Gustav Nil- 796  
711 sonne, Michael P. Nottter, Emanuele Olivetti, Adrian I. Onicas, Paolo Papale, Kaustubh R. 797  
712 Patil, Jonathan E. Peelle, Alexandre Pérez, Doris Pischke, Jean-Baptiste Poline, Yanina 798  
713 Prystauka, Shruti Ray, Patricia A. Reuter-Lorenz, Richard C. Reynolds, Emiliano Ricciardi, 799  
714 Jenny R. Rieck, Anais M. Rodriguez-Thompson, Anthony Romyon, Taylor Salo, Giorgio R. 800  
715 Samanez-Larkin, Emilio Sanz-Morales, Margaret L. Schlichting, Douglas H. Schultz, Oyang 801  
716 Shen, Margaret A. Sheridan, Jennifer A. Silvers, Kenny Skagerlund, Alec Smith, David V. 802  
717 Smith, Peter Sokol-Hessner, Simon R. Steinkamp, Sarah M. Tashjian, Bertrand Thieroy, 803  
718 John N. Thorp, Gustav Tinghög, Loreen Tisdall, Steven H. Tompson, Claudio Toro-Sherin, 804  
719 Juan Jesus Torre Tresols, Leonardo Tozzi, Vuong Truong, Luca Turella, Anna E. van 't Veer, 805  
720 Tom Verguts, Jean M. Vettel, Sagana Vijayarajah, Khoi Vo, Matthew B. Wall, Wouter D. 806  
721 Weeda, Susanne Weis, David J. White, David Wisniewski, Alba Xifra-Porxas, Emily A. Year- 807  
722 ling, Sangsuk Yoon, Rui Yuan, Kenneth S. L. Yuen, Lei Zhang, Xu Zhang, Joshua E. Zosky, 808  
723 Thomas E. Nichols, Russell A. Poldrack, and Tom Schonberg. Variability in the analysis of 809  
724 a single neuroimaging dataset by many teams. *Nature*, 582(7810):84–88, June 2020. ISSN 810  
725 1476-4687. doi: 10.1038/s41586-020-2314-9. Number: 7810 Publisher: Nature Publishing 811  
726 Group. 812
- 727 26. Matthew Cieslak, Philip A. Cook, Xiaosong He, Fang-Cheng Yeh, Thijs Dhollander, Azeez 813  
728 Adebimpe, Geoffrey K. Aguirre, Danielle S. Bassett, Richard F. Betzel, Josiane Bourque, 814  
729 Laura M. Cabral, Christos Davatzikos, John Detre, Eric Earl, Mark A. Elliott, Shreyas 815  
730 Fadnavis, Damien A. Fair, Will Foran, Panagiotis Fotiadis, Eleftherios Garyfallidis, Barry 816
- Giesbrecht, Ruben C. Gur, Raquel E. Gur, Max Kelz, Anisha Keshavan, Bart S. Larsen, 817  
818 Beatriz Luna, Allyson P. Mackey, Michael Milham, Desmond J. Oathes, Anders Perrone, 819  
820 Adam R. Pines, David R. Roalf, Adam Richie-Halford, Ariel Rokem, Valerie J. Snyder, 821  
822 Tinashe M. Taper, Ursula A. Tooley, Jean M. Vettel, Jason D. Yeatman, Scott T. Grafton, 823  
824 and Theodore D. Satterthwaite. QSIprep: An integrative platform for preprocessing and 825  
826 reconstructing diffusion MRI. *bioRxiv*, page 2020.09.04.282269, September 2020. doi: 827  
828 10.1101/2020.09.04.282269. Publisher: Cold Spring Harbor Laboratory Section: New Re- 829  
830 sults. 831
- 832 27. Hadley Wickham. Tidy data. *J. Stat. Softw.*, 59(10), 2014. 833
- 834 28. Eleftherios Garyfallidis, Matthew Brett, Bagrat Amirbekian, Ariel Rokem, Stefan Van 835  
836 Der Walt, Maxime Descoteaux, and Ian Nimmo-Smith. Dipy, a library for the analysis 837  
838 of diffusion MRI data. *Frontiers in Neuroinformatics*, 8, 2014. ISSN 1662-5196. doi: 839  
840 10.3389/fninf.2014.00008. Publisher: Frontiers. 841
- 842 29. Vladimir Fonov, Alan C. Evans, Kelly Botteron, C. Robert Almli, Robert C. McKinsty, 843  
844 D. Louis Collins, and Brain Development Cooperative Group. Unbiased average age- 845  
846 appropriate atlases for pediatric studies. *NeuroImage*, 54(1):313–327, January 2011. ISSN 847  
848 1095-9572. doi: 10.1016/j.neuroimage.2010.07.033. 849
- 850 30. VS Fonov, AC Evans, RC McKinsty, CR Almli, and DL Collins. Unbiased nonlinear average 851  
852 age-appropriate brain templates from birth to adulthood. *NeuroImage*, 47:S102, July 2009. 853  
854 ISSN 1053-8119. doi: 10.1016/S1053-8119(09)70884-5. 855
- 856 31. Flavio Dell'Acqua, Luis Lacerda, Marco Catani, and Andrew Simmons. Anisotropic Power 857  
858 Maps: A diffusion contrast to reveal low anisotropy tissues from HARDI data. page 1. 859
- 860 32. David Qixiang Chen, Flavio Dell'Acqua, Ariel Rokem, Eleftherios Garyfallidis, David J. 861  
862 Hayes, Jidan Zhong, and Mojgan Hodaie. Diffusion weighted image co-registration: In- 863  
864 vestigation of best practices. *bioRxiv*, 2019. doi: 10.1101/864108. 865
- 866 33. B. B. Avants, C. L. Epstein, M. Grossman, and J. C. Gee. Symmetric Diffeomorphic Image 867  
868 Registration with Cross-Correlation: Evaluating Automated Labeling of Elderly and Neuro- 869  
870 degenerative Brain. *Medical image analysis*, 12(1):26–41, February 2008. ISSN 1361- 871  
872 8415. doi: 10.1016/j.media.2007.06.004. 873
- 874 34. Marco Catani, Robert J. Howard, Sinisa Pajevic, and Derek K. Jones. Virtual in vivo inter- 875  
876 active dissection of white matter fasciculi in the human brain. *NeuroImage*, 17(1):77–94, 877  
878 September 2002. ISSN 1053-8119. doi: 10.1006/nimg.2002.1136. 879
- 880 35. Kegang Hua, JIANGYANG ZHANG, Setsu Wakana, Hangyi Jiang, Xin Li, Daniel S. Re- 881  
882 ich, Peter A. Calabresi, James J. Pekar, Peter C. M. van Zijl, and Susumu Mori. Tract 883  
884 probability maps in stereotaxic spaces: analyses of white matter anatomy and tract- 885  
886 specific quantification. *NeuroImage*, 39(1):336–347, January 2008. ISSN 1053-8119. doi: 887  
888 10.1016/j.neuroimage.2007.07.053. 889
- 890 36. Stamatios N Sotiropoulos, Saad Jbabdi, Junqian Xu, Jesper L Andersson, Steen Moeller, 891  
892 Edward J Auerbach, Matthew F Glasser, Moises Hernandez, Guillermo Sapiro, Mark Jenk- 893  
894 inson, David A Feinberg, Essa Yacoub, Christophe Lenglet, David C Van Essen, Kamil 895  
896 Ugurbil, Timothy E J Behrens, and WU-Minn HCP Consortium. Advances in diffusion MRI 897  
898 acquisition and processing in the human connectome project. *Neuroimage*, 80:125–143, 899  
900 October 2013. doi: 10.1016/j.neuroimage.2013.05.057. 901
- 902 37. Martin Cousineau, Pierre-Marc Jodoin, Eleftherios Garyfallidis, Marc-Alexandre Côté, 903  
904 Félix C. Morency, Verena Rozanski, Marilyn Grand'Maison, Barry J. Bedell, and Maxime 905  
906 Descoteaux. A test-retest study on Parkinson's PPMI dataset yields statistically significant 907  
908 white matter fascicles. *NeuroImage: Clinical*, 16:222, 2017. doi: 10.1016/j.nicl.2017.07.020. 909  
910 Publisher: Elsevier. 911
- 912 38. Kenneth O. McGraw and S. P. Wong. Forming inferences about some intraclass correlation 913  
914 coefficients. *Psychological Methods*, 1(1):30–46, 1996. ISSN 1939-1463(Electronic),1082- 915  
916 989X(Print). doi: 10.1037/1082-989X.1.1.30. Place: US Publisher: American Psychological 917  
918 Association. 919
- 920 39. Mariem Boukadi, Karine Marcotte, Christophe Bedetti, Jean-Christophe Houde, Alex 921  
922 Desautels, Samuel Deslauriers-Gauthier, Marianne Chapleau, Arnaud Boré, Maxime De- 923  
924 scoteaux, and Simona M Brambati. Test-Retest reliability of diffusion measures extracted 925  
926 along white matter language fiber bundles using HARDI-Based tractography. *Front. Neuro-* 927  
928 *roscl.*, 12:1055, 2018. 929
- 930 40. Mariem Boukadi, Karine Marcotte, Christophe Bedetti, Jean-Christophe Houde, Alex 931  
932 Desautels, Samuel Deslauriers-Gauthier, Marianne Chapleau, Arnaud Boré, Maxime De- 933  
934 scoteaux, and Simona M. Brambati. Test-Retest Reliability of Diffusion Measures Extracted 935  
936 Along White Matter Language Fiber Bundles Using HARDI-Based Tractography. *Frontiers* 937  
938 *in Neuroscience*, 12, January 2019. ISSN 1662-4548. doi: 10.3389/fnins.2018.01055. 939
- 940 41. Elizabeth Huber, Rafael Neto Henriques, Julia P. Owen, Ariel Rokem, and Jason D. Yeat- 941  
942 man. Applying microstructural models to understand the role of white matter in cognitive 943  
944 development. *Developmental Cognitive Neuroscience*, 36, February 2019. ISSN 1878- 945  
946 9293. doi: 10.1016/j.dcn.2019.100624. 947
- 948 42. Garikoitz Lerma-Usabiaga, Michael L. Perry, and Brian A. Wandell. Reproducible tract pro- 949  
950 files (rtp): from diffusion mri acquisition to publication. *bioRxiv*, page 680173, 2019. 951
- 952 43. Garikoitz Lerma-Usabiaga, Pratik Mukherjee, Michael L. Perry, and Brian A. Wandell. Data- 953  
954 science ready, multisite, human diffusion MRI white-matter-tract statistics. *Scientific Data*, 7, 955  
956 2020. doi: 10.1038/s41597-020-00760-3. Publisher: Nature Publishing Group. 957
- 958 44. Eleftherios Garyfallidis, Marc-Alexandre Côté, Francois Rheault, Jasmeen Sidhu, Janice 959  
960 Hau, Laurent Petit, David Fortin, Stephen Cunnane, and Maxime Descoteaux. Recognition 961  
962 of white matter bundles using local and global streamline-based registration and clustering. 963  
964 *NeuroImage*, 170:283–295, 2018. ISSN 1095-9572. doi: 10.1016/j.neuroimage.2017.07.015. 965
- 966 45. Kurt G Schilling, Francois Rheault, Laurent Petit, Colin B Hansen, Vishvesh Nath, Fang- 967  
968 Cheng Yeh, Gabriel Girard, Muhamed Barakovic, Jonathan Rafael-Patino, Thomas Yu, Elda 969  
970 Fisch-Gomez, Marco Pizzolato, Mario Ocampo-Pineda, Simona Schiavi, Erick J Canales- 971  
972 Rodríguez, Alessandro Daducci, Cristina Gancziera, Giorgio Innocenti, Jean-Philippe Thi- 973  
974 ran, Laura Mancini, Stephen Wastling, Sirio Crocotta, Maria Petracca, Giuseppe Pontillo, 975  
976 Matteo Mancini, Sjoerd B Vos, Vejaj N Vakharia, John S Duncan, Helena Melero, Lidia 977  
978 Manzanedo, Emilio Sanz-Morales, Ángel Peña-Melán, Fernando Calamante, Arnaud Ad- 979  
980 rnaud, Ryan P Cabeen, Laura Korobova, Arthur W Toga, Anupa Ambili Vijayakumari, Drew 981  
982 Parker, Ragini Verma, Ahmed Radwan, Stefan Sunaert, Louise Emsell, Alberto De Luca, 983  
984 Alexander Leemans, Claude J Bajada, Hamed Haroon, Hojjatollah Azadbakht, Maxime 985  
986 Chamberland, Sila Genc, Chantal M W Tax, Ping-Hong Yeh, Rujirutana Srikanhchana, Colin 987



- 817 Mcknight, Joseph Yuan-Mou Yang, Jian Chen, Claire E Kelly, Chun-Hung Yeh, Jerome 903  
818 Cochereau, Jerome J Maller, Thomas Welton, Fabien Almaric, Kiran K Seunarine, Chris A 904  
819 Clark, Fan Zhang, Nikos Makris, Alexandra Golby, Yogesh Rath, Lauren J O'Donnell, Yi- 905  
820 hao Xia, Dogu Baran Aydogan, Yijiang Gong Shi, Francisco Guerreiro Fernandes, Mathijs 906  
821 Raemaekers, Shaun Warrington, Stijn Michiels, Alonso Ramirez-Manzanares, Luis Con- 907  
822 cha, Ramón Aranda, Mariano Rivera Meraz, Garikoitz Lerma-Usabiaga, Lucas Roitman, 908  
823 Lucius S Fekonja, Navona Calarco, Michael Joseph, Hajer Nakua, Aristotle N Voinoskos, 909  
824 Philippe Karan, Gabrielle Grenier, Jon Haitz Legarreta, Nagesh Adluru, Veena A Nair, 910  
825 Vivek Prabhakaran, Andrew L Alexander, Koji Kamagata, Yuya Saito, Wataru Uchida, 911  
826 Christina Andica, Abe Masahiro, Roza G Bayrak, Claudia A Gandini, Egidio D'Angelo, 912  
827 Fulvia Palesi, Giovanni Savini, Nicolò Rolandi, Pamela Guevara, Josselin Houenou, Nar- 913  
828 ciso López-López, Jean-François Mangin, Cyril Poupon, Claudio Román, Andrea Vázquez, 914  
829 Chiara Maffei, Mavilde Arantes, José Paulo Andrade, Susana Maria Silva, Rajikha Raja, 915  
830 Vince D Calhoun, Eduardo Caverzas, Simone Sacco, Michael Lauricella, Franco Pestilli, 916  
831 Daniel Bullock, Yang Zhan, Edith Brignoni-Perez, Catherine Label, Jess E Reynolds, Igor 917  
832 Nestrasil, René Labounek, Christophe Lenglet, Amy Paulson, Stefania Aulicka, Sarah Heil- 918  
833 bronner, Katja Heuer, Adam W Anderson, Bennett A Landman, and Maxime Descoteaux. 919  
834 Tractography dissection variability: what happens when 42 groups dissect 14 white matter 920  
835 bundles on the same dataset? October 2020. doi: 10.1101/2020.10.07.321083. 921  
836 46. Gregory Kiar, Yohan Chatelain, Pablo de Oliveira Castro, Eric Petit, Ariel Rokem, Gaël 922  
837 Varoquaux, Bratislav Misic, Alan C. Evans, and Tristan Glatard. Numerical Instabilities in 923  
838 Analytical Pipelines Lead to Large and Meaningful Variability in Brain Networks. *bioRxiv*, 924  
839 page 2020.10.15.341495, October 2020. doi: 10.1101/2020.10.15.341495. Publisher: Cold 925  
840 Spring Harbor Laboratory Section: New Results. 926  
841 47. Robert F Dougherty, Michal Ben-Shachar, Roland Bammer, Alyssa A Brewer, and Brian A 927  
842 Wandell. Functional organization of human occipital-callosal fiber tracts. *Proc. Natl. Acad. Sci. U. S. A.*, 102(20):7350–7355, May 2005. 928  
843 48. Karl J. Friston. Statistical Parametric Mapping. In Rolf Kötter, editor, *Neuroscience* 930  
844 *Databases: A Practical Guide*, pages 237–250. Springer US, Boston, MA, 2003. ISBN 931  
845 978-1-4615-1079-6. doi: 10.1007/978-1-4615-1079-6\_16. 932  
846 49. Garikoitz Lerma-Usabiaga, Noah Benson, Jonathan Winawer, and Brian A Wandell. A 933  
847 validation framework for neuroimaging software: The case of population receptive fields. 934  
848 *PLoS Comput. Biol.*, 16(6):e1007924, June 2020. 935  
849 50. Peter F Neher, Frederik B Laun, Bram Stieltjes, and Klaus H Maier-Hein. Fiberfox: 936  
850 tating the creation of realistic white matter software phantoms. *Magn. Reson. Med.*, 72(5): 937  
851 1460–1470, November 2014. 938  
852 51. Maya Yablonski, Benjamin Menashe, and Michal Ben-Shachar. A general role for ventral 939  
853 white matter pathways in morphological processing: Going beyond reading. *NeuroImage*, 940  
854 226:117577, November 2020. 941  
855 52. Jason D Yeatman, Adam Richie-Halford, Josh K Smith, Anisha Keshavan, and Ariel Rokem. 942  
856 A browser-based tool for visualization and analysis of diffusion MRI data. *Nat. Commun.*, 943  
857 (1):940, March 2018. 944  
858 53. Satrajit S. Ghosh, Jean-Baptiste Poline, David B. Keator, Yaroslav O. Halchenko, Adam G. 945  
859 Thomas, Daniel A. Kessler, and David N. Kennedy. A very simple, re-executable neu- 946  
860 roimaging publication. *F1000Research*, 6:124, June 2017. ISSN 2046-1402. doi: 947  
861 10.12688/f1000research.10783.2. 948  
862 54. Jakob Wasserthal, Peter Neher, and Klaus H Maier-Hein. Tractseg-fast and accurate white 949  
863 matter tract segmentation. *NeuroImage*, 183:239–253, 2018. 950  
864 55. Giulia Berò, Daniel Bullock, Pietro Astolfi, Siocai Hayashi, Luca Zigiotta, Luciano Annic- 951  
865 chiarico, Francesco Corsini, Alessandro De Benedictis, Silvio Sarubbo, Franco Pestilli, et al. 952  
866 Classifyer, a robust streamline-based linear classifier for white matter bundle segmenta- 953  
867 tion. *BioRxiv*, 2020. 954  
868 56. Bramsh Qamar Chandio, Shannon Leigh Risacher, Franco Pestilli, Daniel Bullock, Fang- 955  
869 Cheng Yeh, Serge Koudoro, Ariel Rokem, Jaroslaw Harezlak, and Eleftherios Garyfallidis. 956  
870 Bundle analytics, a computational framework for investigating the shapes and profiles of 957  
871 brain pathways across populations. *Scientific Reports*, 10(1):17149, October 2020. ISSN 958  
872 2045-2322. doi: 10.1038/s41598-020-74054-4. Number: 1 Publisher: Nature Publishing 959  
873 Group. 960  
874 57. Samuel St-Jean, Maxime Chamberland, Max A. Viergever, and Alexander Leemans. Re- 961  
875 ducing variability in along-tract analysis with diffusion profile realignment. *NeuroImage*, 199: 962  
876 663–679, October 2019. ISSN 1095-9572. doi: 10.1016/j.neuroimage.2019.06.016. 963  
877 58. Pauli Virtanen, Ralf Gommers, Travis E Oliphant, Matt Haberland, Tyler Reddy, David Cour- 964  
878 napeau, Evgeni Burovski, Pearu Peterson, Warren Weckesser, Jonathan Bright, Stéfan J 965  
879 van der Walt, Matthew Brett, Joshua Wilson, K Jarrod Millman, Nikolay Mayorov, Andrew 966  
880 R J Nelson, Eric Jones, Robert Kern, Eric Larson, C J Carey, Ilhan Polat, Yu Feng, Eric W 967  
881 Moore, Jake VanderPlas, Denis Laxalde, Josef Perktold, Robert Cimrman, Ian Henriksen, 968  
882 E A Quintero, Charles R Harris, Anne M Archibald, Antônio H Ribeiro, Fabian Pedregosa, 969  
883 Paul van Mulbregt, and SciPy 1.0 Contributors. SciPy 1.0: fundamental algorithms for sci- 970  
884 entific computing in python. *Nat. Methods*, 17(3):261–272, March 2020. 971  
885 59. Sphinx, November 2020. 972  
886 60. Sphinx-Gallery, November 2020. 973  
887 61. Brian Hansen and Sune Nørhøj Jespersen. Data for evaluation of fast kurtosis strategies, 974  
888 b-value optimization and exploration of diffusion MRI contrast. *Scientific Data*, 3(1):160072, 975  
889 August 2016. ISSN 2052-4463. doi: 10.1038/sdata.2016.72. Number: 1 Publisher: Nature 976  
890 Publishing Group. 977  
891 62. Matthew Rocklin. Dask: Parallel Computation with Blocked Algorithms and Task Scheduling. 978  
892 pages 126–132, Austin, Texas, 2015. doi: 10.25080/Majora-7b98c3ed-013. 979  
893 63. Adam Richie-Halford and Ariel Rokem. Cloudknot: A Python Library to Run your Existing 980  
894 Code on AWS Batch. *Proceedings of the 17th Python in Science Conference*, pages 8–14, 981  
895 2018. doi: 10.25080/Majora-4af1f417-001. Conference Name: Proceedings of the 17th 982  
896 Python in Science Conference. 983  
897 64. Tom Preston-Werner. tom, January 2021. original-date: 2013-02-24T03:03:57Z. 984  
898 65. Tristan Glatard, Gregory Kiar, Tristan Aumentado-Armstrong, Natacha Beck, Pierre Bellec, 985  
899 Rémi Bernard, Axel Bonnet, Shawn T. Brown, Sorina Camarasu-Pop, Frédéric Cervenac, 986  
900 sky, Samir Das, Rafael Ferreira da Silva, Guillaume Flandin, Pascal Girard, Krzysztof J. 987  
901 Gorgolewski, Charles R. G. Guttman, Valérie Hayot-Sasson, Pierre-Olivier Quirion, Pierre 988  
902 Rioux, Marc-Étienne Rousseau, and Alan C. Evans. Boutiques: a flexible framework to in-  
tegrate command-line applications in computing platforms. *GigaScience*, 7(5), May 2018.  
doi: 10.1093/gigascience/giy016. Publisher: Oxford Academic.  
66. Tal Yarkoni, Christopher J. Markiewicz, Alejandro de la Vega, Krzysztof J. Gorgolewski,  
Taylor Salo, Yaroslav O. Halchenko, Quinten McNamara, Krista DeStasio, Jean-Baptiste  
Poline, Hans Johnson, Oscar Esteban, Dmitry Petrov, James D. Kent, Stefan Appelhoff,  
Valérie Hayot-Sasson, Dylan M. Nielson, Johan Carlin, Gregory Kiar, Kirstie Whitaker,  
Satrajit Ghosh, Adina Wagner, Elizabeth DuPre, Andrew Janke, Alexander Ivanov, Ashley  
Gillman, Johannes Wennberg, Lee S. Tirrell, Steven Tilley II, Adam Li, Jon Haitz  
Legarreta, Mainak Jas, Michael Hanke, Russell Poldrack, Chadwick Boulay, Chris Hold-  
graf, Evgenii Kalenkovich, Isla Staden, Remi Gau, Ariel Rokem, Bertrand Thirion, Dave F.  
Kleinschmidt, Erin W. Dickie, John A. Lee, Mathias Goncalves, Matteo Visconti di Olegio-  
Castello, Michael Philipp Notter, Pauline Roca, and Ross Blair. PyBIDS: Python tools  
for BIDS datasets, July 2020.  
67. Tal Yarkoni, Christopher J. Markiewicz, Alejandro de la Vega, Krzysztof J. Gorgolewski,  
Taylor Salo, Yaroslav O. Halchenko, Quinten McNamara, Krista DeStasio, Jean-Baptiste  
Poline, Dmitry Petrov, Valérie Hayot-Sasson, Dylan M. Nielson, Johan Carlin, Gregory Kiar,  
Kirstie Whitaker, Elizabeth DuPre, Adina Wagner, Lee S. Tirrell, Mainak Jas, Michael Hanke,  
Russell A. Poldrack, Oscar Esteban, Stefan Appelhoff, Chris Holdgraf, Isla Staden, Bertrand  
Thirion, Dave F. Kleinschmidt, John A. Lee, Matteo Visconti Oleggio di Castello, Michael P.  
Notter, and Ross Blair. PyBIDS: Python tools for BIDS datasets. *Journal of Open Source  
Software*, 4(40):1294, August 2019. ISSN 2475-9066. doi: 10.21105/joss.01294.  
68. Krzysztof J. Gorgolewski, Tibor Auer, Vince D. Calhoun, R. Cameron Craddock, Samir  
Das, Eugene P. Duff, Guillaume Flandin, Satrajit S. Ghosh, Tristan Glatard, Yaroslav O.  
Halchenko, Daniel A. Handwerker, Michael Hanke, David Keator, Xiangrui Li, Zachary  
Michael, Camille Maumet, B. Nolan Nichols, Thomas E. Nichols, John Pellman, Jean-  
Baptiste Poline, Ariel Rokem, Gunnar Schafer, Vanessa Sochat, William Triplett, Jessica A.  
Turner, Gaël Varoquaux, and Russell A. Poldrack. The brain imaging data structure, a for-  
mat for organizing and describing outputs of neuroimaging experiments. *Scientific Data*, 3  
(1):160044, June 2016. ISSN 2052-4463. doi: 10.1038/sdata.2016.44. Number: 1 Publisher:  
Nature Publishing Group.  
69. Matthew Brett, Christopher J. Markiewicz, Michael Hanke, Marc-Alexandre Côté, Ben  
Cipollini, Paul McCarthy, Dorota Jarecka, Christopher P. Cheng, Yaroslav O. Halchenko,  
Michiel Cottar, Eric Larson, Satrajit Ghosh, Demian Wassermann, Stephan Gerhard,  
Gregory R. Lee, Hao-Ting Wang, Erik Kastman, Jakub Kaczmarzyk, Roberto Giorditi,  
Or Duek, Jonathan Daniel, Ariel Rokem, Cindee Madison, Brendan Moloney, Félix C.  
Morency, Mathias Goncalves, Ross Markello, Cameron Riddell, Christopher Burns, Jar-  
rod Millman, Alexandre Gramfort, Jaakko Leppäakangas, Anibal Sólón, Jasper J.F. van den  
Bosch, Robert D. Vincent, Henry Braun, Krish Subramaniam, Krzysztof J. Gorgolewski,  
Pradeep Reddy Raamana, Julian Klug, B. Nolan Nichols, Eric M. Baker, Soichi Hayashi,  
Basile Pinsard, Christian Haselgrove, Mark Hymers, Oscar Esteban, Serge Koudoro,  
Fernando Pérez-García, Nikolaas N. Oosterhof, Bago Amirbekian, Ian Nimmo-Smith,  
Ly Nguyen, Samir Reddigari, Samuel St-Jean, Egor Panfilov, Eleftherios Garyfallidis,  
Gael Varoquaux, Jon Haitz Legarreta, Kevin S. Hahn, Oliver P. Hinds, Bennet Fauber,  
Jean-Baptiste Poline, Jon Stutters, Keshi Jordan, Matthew Cieslak, Miguel Estevan  
Moreno, Valentin Haenel, Yannick Schwartz, Zvi Baratz, Benjamin C Darwin, Bertrand  
Thirion, Carl Gauthier, Dimitri Papadopoulos Orfanos, Igor Solovey, Ivan Gonzalez,  
Jath Palasubramaniam, Justin Lecher, Katrin Leinweber, Konstantinos Raktivan, Markéta  
Calábková, Peter Fischer, Philippe Gervais, Syam Gadde, Thomas Ballinger, Thomas Roos,  
Venkateswara Reddy Reddam, and freee83a. nipy/nibabel: 3.2.0, October 2020.  
70. Maxime Descoteaux, Rachid Deriche, Thomas R. Knösche, and Alfred Anwander. De-  
terministic and probabilistic tractography based on complex fibre orientation distributions.  
*IEEE transactions on medical imaging*, 28(2):269–286, February 2009. ISSN 1558-254X.  
doi: 10.1109/TMI.2008.2004424.  
71. P. J. Basser, J. Mattiello, and D. LeBihan. Estimation of the effective self-diffusion tensor  
from the NMR spin echo. *Journal of Magnetic Resonance. Series B*, 103(3):247–254, March  
1994. ISSN 1064-1866. doi: 10.1006/jmrb.1994.1037.  
72. Peter J. Basser and Carlo Pierpaoli. Microstructural and physiological features of tissues  
elucidated by quantitative-diffusion-tensor MRI. 1996. *Journal of Magnetic Resonance (San  
Diego, Calif.: 1997)*, 213(2):560–570, December 2011. ISSN 1096-0856. doi: 10.1016/j.  
jmr.2011.09.022.  
73. Ali Tabesh, Jens H. Jensen, Babak A. Ardekani, and Joseph A. Helpert. Estimation of  
tensors and tensor-derived measures in diffusional kurtosis imaging. *Magnetic Resonance  
in Medicine*, 65(3):823–836, March 2011. ISSN 1522-2594. doi: 10.1002/mrm.22655.  
74. J.-Donald Tournier, Fernando Calamante, David G. Gadian, and Alan Connelly. Direct es-  
timation of the fiber orientation density function from diffusion-weighted MRI data using  
spherical deconvolution. *NeuroImage*, 23(3):1176–1185, November 2004. ISSN 1053-  
8119. doi: 10.1016/j.neuroimage.2004.07.037.  
75. J.-Donald Tournier, Fernando Calamante, and Alan Connelly. Robust determination of  
the fiber orientation distribution in diffusion MRI: non-negativity constrained super-resolved  
spherical deconvolution. *NeuroImage*, 35(4):1459–1472, May 2007. ISSN 1053-8119. doi:  
10.1016/j.neuroimage.2007.02.016.  
76. Ben Jeurissen, Jacques-Donald Tournier, Thijs Dhollander, Alan Connelly, and Jan Sijbers.  
Multi-tissue constrained spherical deconvolution for improved analysis of multi-shell dif-  
fusion MRI data. *NeuroImage*, 103:411–426, December 2014. ISSN 1095-9572. doi:  
10.1016/j.neuroimage.2014.07.061.  
77. Gabriel Girard, Kevin Whittingstall, Rachid Deriche, and Maxime Descoteaux. Towards  
quantitative connectivity analysis: reducing tractography biases. *NeuroImage*, 98:266–278,  
September 2014. ISSN 1095-9572. doi: 10.1016/j.neuroimage.2014.04.074.  
78. Robert E. Smith, Jacques-Donald Tournier, Fernando Calamante, and Alan Connelly.  
Anatomically-constrained tractography: improved diffusion MRI streamlines tractography  
through effective use of anatomical information. *NeuroImage*, 62(3):1924–1938, Septem-  
ber 2012. ISSN 1095-9572. doi: 10.1016/j.neuroimage.2012.06.005.  
79. Marc-Alexandre Côté, Gabriel Girard, Arnaud Boré, Eleftherios Garyfallidis, Jean-  
Christophe Houde, and Maxime Descoteaux. Tractometer: towards validation of tractog-  
raphy pipelines. *Medical Image Analysis*, 17(7):844–857, October 2013. ISSN 1361-8423.



- 989 doi: 10.1016/j.media.2013.03.009.
- 990 80. Fidel Alfaro-Almagro, Mark Jenkinson, Neal K. Bangerter, Jesper L. R. Andersson, Ludovica
- 991 Griffanti, Gwenaëlle Douaud, Stamatios N. Sotiropoulos, Saad Jbabdi, Moises Hernandez-
- 992 Fernandez, Emmanuel Vallee, Diego Vidaurre, Matthew Webster, Paul McCarthy, Christo-
- 993 pher Rorden, Alessandro Daducci, Daniel C. Alexander, Hui Zhang, Iulius Dragonu, Paul M.
- 994 Matthews, Karla L. Miller, and Stephen M. Smith. Image processing and Quality Control
- 995 for the first 10,000 brain imaging datasets from UK Biobank. *NeuroImage*, 166:400–424,
- 996 February 2018. ISSN 1053-8119. doi: 10.1016/j.neuroimage.2017.10.034.
- 997 81. Karla L. Miller, Fidel Alfaro-Almagro, Neal K. Bangerter, David L. Thomas, Essa Yacoub,
- 998 Junqian Xu, Andreas J. Bartsch, Saad Jbabdi, Stamatios N. Sotiropoulos, Jesper L. R.
- 999 Andersson, Ludovica Griffanti, Gwenaëlle Douaud, Thomas W. Okell, Peter Weale, Iulius
- 1000 Dragonu, Steve Garratt, Sarah Hudson, Rory Collins, Mark Jenkinson, Paul M. Matthews,
- 1001 and Stephen M. Smith. Multimodal population brain imaging in the UK Biobank prospective
- 1002 epidemiological study. *Nature Neuroscience*, 19(11):1523–1536, November 2016. ISSN
- 1003 1546-1726. doi: 10.1038/nn.4393. Number: 11 Publisher: Nature Publishing Group.
- 1004 82. Eleftherios Garyfallidis, Omar Ocegueda, Demian Wassermann, and Maxime Descoteaux.
- 1005 Robust and efficient linear registration of white-matter fascicles in the space of streamlines.
- 1006 *NeuroImage*, 117:124–140, August 2015. ISSN 1053-8119. doi: 10.1016/j.neuroimage.
- 1007 2015.05.016.
- 1008 83. Oscar Esteban, Rastko Ciric, Christopher J. Markiewicz, Yaroslav O. Halchenko, Mathias
- 1009 Goncalves, Satrajit S. Ghosh, Russell A. Poldrack, and Krzysztof J. Gorgolewski. Template-
- 1010 Flow: Standardizing standard 3D spaces in neuroimaging, November 2019.
- 1011 84. Nobuyuki Otsu. A Threshold Selection Method from Gray-Level Histograms. *IEEE Transac-*
- 1012 *tions on Systems, Man, and Cybernetics*, 9(1):62–66, January 1979. ISSN 2168-2909. doi:
- 1013 10.1109/TSMC.1979.4310076. Conference Name: IEEE Transactions on Systems, Man,
- 1014 and Cybernetics.
- 1015 85. David Chen, Flavio Dell'Acqua, Ariel Rokem, Eleftherios Garyfallidis, Jidan Zhong, and
- 1016 Mojgan Hodaie. Diffusion Weighted Image Co-registration: Investigation of Best Practices.
- 1017 December 2019. doi: 10.1101/864108.
- 1018 86. Setsu Wakana, Arvind Caprihan, Martina M. Panzenboeck, James H. Fallon, Michele Perry,
- 1019 Randy L. Gollub, Kegang Hua, Jiangyang Zhang, Hangyi Jiang, Prachi Dubey, Ari Blitz,
- 1020 Peter van Zijl, and Susumu Mori. Reproducibility of Quantitative Tractography Methods
- 1021 Applied to Cerebral White Matter. *NeuroImage*, 36(3):630–644, July 2007. ISSN 1053-
- 1022 8119. doi: 10.1016/j.neuroimage.2007.02.049.
- 1023 87. N. Tzourio-Mazoyer, B. Landeau, D. Papathanassiou, F. Crivello, O. Etard, N. Delcroix,
- 1024 B. Mazoyer, and M. Joliot. Automated anatomical labeling of activations in SPM using a
- 1025 macroscopic anatomical parcellation of the MNI MRI single-subject brain. *NeuroImage*, 15
- 1026 (1):273–289, January 2002. ISSN 1053-8119. doi: 10.1006/nimg.2001.0978.
- 1027 88. C. Bradford Barber, David P. Dobkin, and Hannu Huhdanpaa. The quickhull algorithm for
- 1028 convex hulls. *ACM Transactions on Mathematical Software*, 22(4):469–483, December
- 1029 1996. ISSN 0098-3500, 1557-7295. doi: 10.1145/235815.235821.
- 1030 89. FURY, October 2020.
- 1031 90. Plotly Python Graphing Library, October 2020.
- 1032 91. David C. Van Essen, Stephen M. Smith, Deanna M. Barch, Timothy E. J. Behrens, Essa
- 1033 Yacoub, and Kamil Ugurbil. The WU-Minn Human Connectome Project: An overview. *Neu-*
- 1034 *roImage*, 80:62–79, October 2013. ISSN 1053-8119. doi: 10.1016/j.neuroimage.2013.05.
- 1035 041.
- 1036 92. Lin-Ching Chang, Derek K. Jones, and Carlo Pierpaoli. RESTORE: robust estimation of
- 1037 tensors by outlier rejection. *Magnetic Resonance in Medicine*, 53(5):1088–1095, May 2005.
- 1038 ISSN 0740-3194. doi: 10.1002/mrm.20426.
- 1039 93. J-Donald Tournier, Robert Smith, David Raffelt, Rami Tabbara, Thijs Dhollander, Maximilian
- 1040 Pietsch, Daan Christiaens, Ben Jeurissen, Chun-Hung Yeh, and Alan Connelly. MRtrix3: A
- 1041 fast, flexible and open software framework for medical image processing and visualisation.
- 1042 *NeuroImage*, 202:116137, November 2019.
- 1043 94. Lee R. Dice. Measures of the Amount of Ecologic Association Between Species. *Ecol-*
- 1044 *ogy*, 26(3):297–302, 1945. ISSN 00129658, 19399170. doi: 10.2307/1932409. Publisher:
- 1045 Ecological Society of America.
- 1046 95. Matthew Cieslak, Philip A Cook, Xiaosong He, Fang-Cheng Yeh, Thijs Dhollander, Azeez
- 1047 Adebimpe, Geoffrey K Aguirre, Danielle S Bassett, Richard F Betzel, Josiane Bourque, et al.
- 1048 Qsirep: An integrative platform for preprocessing and reconstructing diffusion mri. *bioRxiv*,
- 1049 2020.
- 1050 96. J-Donald Tournier, Robert Smith, David Raffelt, Rami Tabbara, Thijs Dhollander, Maximilian
- 1051 Pietsch, Daan Christiaens, Ben Jeurissen, Chun-Hung Yeh, and Alan Connelly. Mrtrix3: A
- 1052 fast, flexible and open software framework for medical image processing and visualisation.
- 1053 *NeuroImage*, 202:116137, 2019.
- 1054 97. Lindsay M Alexander, Jasmine Escalera, Lei Ai, Charissa Andreotti, Karina Febre, Alexan-
- 1055 der Mangone, Natan Vega-Potler, Nicolas Langer, Alexis Alexander, Meagan Kovacs, Shan-
- 1056 non Litke, Bridget O'Hagan, Jennifer Andersen, Batya Bronstein, Anastasia Bui, Marijayne
- 1057 Bushey, Henry Butler, Victoria Castagna, Nicolas Camacho, Elisha Chan, Danielle Citera,
- 1058 Jon Clucas, Samantha Cohen, Sarah Dufek, Megan Eaves, Brian Fradera, Judith Gardner,
- 1059 Natalie Grant-Villegas, Gabriella Green, Camille Gregory, Emily Hart, Shana Harris, Megan
- 1060 Horton, Danielle Kahn, Katherine Kabotyanski, Bernard Karmel, Simon P Kelly, Kayla Klein-
- 1061 man, Bonhwang Koo, Eliza Kramer, Elizabeth Lennon, Catherine Lord, Ginny Mantello, Amy
- 1062 Margolis, Kathleen R Merikangas, Judith Milham, Giuseppe Minniti, Rebecca Neuhaus,
- 1063 Alexandra Levine, Yael Osman, Lucas C Parra, Ken R Pugh, Amy Racanello, Anita Res-
- 1064 strepo, Tian Saltzman, Batya Septimus, Russell Tobe, Rachel Waltz, Anna Williams, Anna
- 1065 Yeo, Francisco X Castellanos, Arno Klein, Tomas Paus, Bennett L Leventhal, R Cameron
- 1066 Craddock, Harold S Koplewicz, and Michael P Milham. An open resource for transdiagnostic
- 1067 research in pediatric mental health and learning disorders. *Sci Data*, 4:170181, December
- 1068 2017.
- 1069 98. Martin Lindquist. Neuroimaging results altered by varying analysis pipelines. *Nature*, 582
- 1070 (7810):36–37, June 2020. doi: 10.1038/d41586-020-01282-z. Number: 7810 Publisher:
- 1071 Nature Publishing Group.
- 1072 99. Robert F Dougherty, Michal Ben-Shachar, Gayle K Deutsch, Arvel Hernandez, Glenn R
- 1073 Fox, and Brian A Wandell. Temporal-callosal pathway diffusivity predicts phonological skills
- 1074 in children. *Proc. Natl. Acad. Sci. U. S. A.*, 104(20):8556–8561, May 2007.

## 1075 **Supplementary Methods**

1076 **Automated Fiber Quantification in Python (pyAFQ).** Inspired by a previous MATLAB implementation (9), We developed  
1077 a software library that automates dMRI-based tractometry analysis. The library is called pyAFQ (Python Automated Fiber  
1078 Quantification), and it is implemented as open-source software here: <https://github.com/yeatmanlab/pyAFQ>. The  
1079 software is developed under the permissive OSI-approved BSD license. It allows users to specify the methods and param-  
1080 eters they want to use for tractometry. pyAFQ uses many components of the scientific Python ecosystem (58). In particular,  
1081 it relies heavily on implementations of algorithms for diffusion reconstruction, orientation determination, tractography and  
1082 image registration implemented in Diffusion Imaging in Python (DIPY), an open-source, Python library for computational neu-  
1083 roanatomy (28). The pyAFQ software implements extensive documentation with Sphinx (59), including a gallery of executable  
1084 examples, implemented using Sphinx Gallery (60). Unit testing is implemented using pytest, with continuous integration im-  
1085 plemented to test proposed changes to the library, as well as longer nightly tests that check that pipelines of operations are  
1086 not adversely affected by changes that are introduced in developing the software. pyAFQ's test suite uses the HARDI data  
1087 collected for (16), CFIN (61), and data from the Human Connectome Project. pyAFQ can be parallelized across subjects and  
1088 sessions using dask (62). The analysis performed in this paper primarily used pyAFQ run using Cloudknot (63) on Amazon  
1089 Web Services (AWS).

1090 There are many ways to analyze dMRI data and to estimate tractometry-based tract-profiles. For example, many different  
1091 models are used to determine the directions of tracking within each voxel and to connect different voxels with a variety of  
1092 tractography algorithms. Similarly, different models can be used to determine the tissue properties within a voxel. However, it  
1093 is hard to determine which methods to use, because different methods may be appropriate for different datasets, depending  
1094 on their characteristics: the measurements conducted, the signal to noise ratio (SNR) of the data and so forth. Software to support  
1095 analysis of a variety of datasets should make it easy to use many different methods and to compare results between methods.  
1096 All of the choices the user can make in each of the steps of pyAFQ are delineated below and summarized in Fig. S2. The  
1097 software implements a library with an object-oriented application programming interface (API), as well as a command-line  
1098 interface (CLI). Using pyAFQ's API, pyAFQ can be run with only a few lines of code. The API is also flexible, giving the user  
1099 the ability to choose which algorithms and parameters to use. For users unfamiliar with python, pyAFQ has a command line  
1100 interface (CLI) which uses a configuration file written in TOML (64). pyAFQ also has a Boutiques configuration file and can  
1101 be executed using Boutiques (65).

1102 **Locating and mapping data (BIDS).** The first step in analysis is to find the files that the software will use. pyAFQ relies on  
1103 pyBIDS (66, 67) to query data that is provided in the BIDS format (68). It looks for dMRI, b-value, and b-vector files stored  
1104 in standard formats (see <https://yeatmanlab.github.io/pyAFQ/usage/data.html> for details). Additionally,  
1105 the user can provide files from other processing pipelines to be used as a brain mask during registration or as start or stop  
1106 masks during tractography, as well as completed tractography results. We typically use the Nibabel software library to interact  
1107 with neuroimaging files (69). Following the BIDS standard, the outputs of pyAFQ are put in the BIDS derivatives folder, in a  
1108 pipeline directory labelled as "afq". The derivative BIDS format follows as much as possible the draft implementation of the  
1109 BIDS derivatives for dMRI data.

1110 **Tractography.** There are several methods for computational tractography. The pyAFQ software exposes many of these as op-  
1111 tions. It allows users to choose from multiple fiber orientation distribution functions (70) that determine the direction of tracking  
1112 in each step of the process: based on Diffusion Tensor Imaging (DTI) (71, 72), Diffusion Kurtosis Imaging (DKI) (73), Con-  
1113 strained Spherical Deconvolution (CSD) (74, 75), and Multi-Shell Multi-Tissue Constrained Spherical Deconvolution (MSMT-  
1114 CSD) (76). Deterministic and probabilistic tractography algorithms can be used and stopping criteria can be implemented for  
1115 particle filtering tractography, using the continuous map criterion (77) or anatomically-constrained tractography (78). The de-  
1116 fault tractography setting uses DTI, deterministic direction finding, a max turning angle per step of  $30^\circ$ , one seed per voxel, and  
1117 retains only streamlines between 10 and 1000mm long. Many of our tractography defaults are inspired by the results of (79)  
1118 and (9). The default seed and stop masks are created by thresholding FA at 0.2. All of these parameters can be customized  
1119 using pyAFQ's API or CLI.

1120 **Template registration.** The user can specify their own template and subject image to register, however pyAFQ also provides four  
1121 builtin options: register subject non-diffusion weighted image (also known as b0) to the Montreal Neurological Institute (MNI)  
1122 T2 template (29, 30); register subject FA to a group mean fractional anisotropy (FA) template from the UK Biobank (80, 81);  
1123 register a subject's anisotropic power map (APM) (31, 32) to the MNI T1 template; and register subject streamlines to the 16  
1124 bundles human connectome project (HCP) atlas (7) using streamline registration (SLR) (82). The first three of these builtin  
1125 techniques use the nonlinear Symmetric Diffeomorphic Registration (SyN) (33) after an optional linear preregistration, both  
1126 implemented in DIPY. pyAFQ uses Templateflow (83) to get MNI T1/T2 templates for registration. The default registration  
1127 behavior is to consider all b-values under 50 to be b0, mask the subject's APM using DIPY's median\_otsu image recognition  
1128 algorithm (84) on the subject b0, and register the masked power map to the masked MNI T1 template. Per default, we chose to

1129 use the APM for registration based on previous findings that show this is a good choice (85) and based on our own experience.  
1130 All of these parameters can be customized using pyAFQ's API and CLI.

1131 **Bundle recognition and cleaning.** To identify the streamlines that best represent a particular anatomical pathway, we perform  
1132 bundle recognition. The default behavior is to perform the initial classification using probability maps, and then segment with  
1133 waypoint ROIs defined in (86), then filter the classified streamlines by their termination locations, using the AAL atlas (87),  
1134 where streamlines must be within 4mm of the expected endpoint region. Waypoint ROIs are moved into the subject space and  
1135 then patched up using the Quickhull Algorithm (88). There is also an option, turned off by default, to clip streamline edges at  
1136 the ROIs (86).

1137 In addition to the waypoint-based recognition described above, pyAFQ also allows the user to choose to use a streamline atlas  
1138 based bundle recognition method, called RecoBundles (44). Parameters for either algorithm can be customized using pyAFQ's  
1139 API and CLI.

1140 After recognition, cleaning is performed based on the Mahalanobis distance of each streamline from the mean in each node.  
1141 This process was originally described in (9). By default, pyAFQ resamples streamlines to 100 points (nodes) and performs  
1142 5 rounds of cleaning with a distance threshold of 5 standard deviations from the mean of the node coordinates at each point,  
1143 and a length threshold of 4 standard deviations from the mean length. Cleaning is also stopped if a bundle has less than 20  
1144 streamlines. All of these parameters can be customized using pyAFQ's API and CLI.

1145 **Tract Profile Extraction.** After cleaning, pyAFQ computes and visualizes tract profiles. The mean profile (called a "tract profile")  
1146 is calculated using the same Mahalanobis distance-based weighting strategy as in Yeatman et al. (9), implemented in DIPY.  
1147 Visualization can be performed using one of two backends: fury (89) or plotly (90), which create either animated gifs or  
1148 interactive html files respectively. Visualizations are created for the whole brain tractometry and for each individual bundle.

1149 **Data.** We measured the reliability of tractometry using two datasets with contrasting characteristics.

1150 **Human Connectome Project (HCP-TR).** The WU-Minn Human Connectome Project (HCP) (91) includes measurements of  
1151 diffusion MRI data from almost all of the 1,200 participants. Here, we focus our analysis on a subset of these subjects for  
1152 which test-retest data are available. We refer to this data as HCP-TR. This dataset contains dMRI data from 44 individuals.  
1153 This represents a relatively high-quality, high-resolution dataset, with multiple diffusion directions and multiple b-values. The  
1154 acquisition parameters of HCP-TR are described in detail elsewhere (36). We used data that had been preprocessed through the  
1155 HCP pipelines, as provided through the AWS Open Data program (<https://registry.opendata.aws/hcp-openaccess/>).

1156 **University of Washington Pre-K (UW-PREK).** Two measurements were conducted in each participant 1 day apart. These were  
1157 acquired with 32 directions,  $b=1,500 \text{ s/mm}^2$ ,  $2 \text{ mm}^3$  isotropic resolution,  $TR/TE=7200/83 \text{ msec}$ . Data were preprocessed using  
1158 FSL for eddy current, motion correction, and susceptibility distortion correction. Analysis using the mAFQ was conducted as  
1159 previously described (9). We converted UW-PREK to BIDS format (68) for input into pyAFQ's API.

1160 We attempted to configure pyAFQ to most closely match the mAFQ configuration. We used robust estimation of tensors by  
1161 outlier rejection (RESTORE) (92) to fit the DTI model. In tractography, we used 160,000 seeds randomly distributed wherever  
1162 DTI FA is higher than 0.3. We used only 1 round of cleaning. We ran this on both the UW-PREK pre and post sessions, and  
1163 compared its reproducibility to the results on the same datasets with mAFQ. We also compared the robustness of the results  
1164 between the pyAFQ and mAFQ algorithms on the pre-session data only.

1165 **Configurations.** For all configurations, we used the Freesurfer brain segmentation provided by HCP to calculate a permissive  
1166 brain mask, with all portions of the image not labelled as 0, considered part of the brain. The brain mask is used when fitting  
1167 the ODF models. We compared the TRR of each configuration, as well as the robustness of the results across configurations.  
1168 We also compared the TRR of these configurations to the TRR of results published by Lerma-Usabiaga and colleagues (43),  
1169 denoted RTP.

1170 **DTI Configuration.** In addition to the three configurations enumerated in the present paper, we processed HCP-TR with a fourth  
1171 configuration. We used only measurements with b-values between 990 and  $1010 \text{ s/mm}^2$ . We used DTI as the ODF model for  
1172 tractography and profile extraction. We compared this configuration to RTP in 3D,E. We also analysed DTI for robustness and  
1173 found its results to be nearly identical to DKI.

1174 **RecoBundles Configuration.** One of the configurations we ran on the HCP-TR data used RecoBundles (8). pyAFQ provides  
1175 programmatic access to two atlases, one being the full 80 bundles human connectome project (HCP) atlas (7), and other being  
1176 a 16 bundle subset of that atlas. We ran RecoBundles on HCP-TR using the full 80 bundles atlas. We use the following  
1177 RecoBundles parameter configuration: a model cluster threshold of 1.25, a reduction threshold of 25, no refinement, a pruning  
1178 threshold of 12, local streamline-based linear registration on with an asymmetric metric. We used this configuration for all 80  
1179 bundles. Multi-shell data and the DKI ODF model were used. We used nonlinear symmetric diffeomorphic registration and a  
1180 brain mask based on the HCP-provided segmentation.

1181 **RTP.** As a point of comparison, we used an open dataset of HCP-TR derivatives that was published by Lerma-Usabiaga and  
1182 colleagues (43). They processed HCP-TR using the Reproducible Tract Profiles (RTP) pipeline (42). This pipeline is a full  
1183 end-to-end pipeline and system for deployment of analysis that receives as input raw MRI data as acquired on the scanner.  
1184 While it applies different preprocessing steps and uses different tractography algorithms than mAFQ, relying on MRTRIX for  
1185 many of these steps (93), the bundle recognition steps closely resemble the ones used in mAFQ, relying on functions that stem  
1186 from the same MATLAB codebase as mAFQ. The end result of RTP are tract profiles in an easy-to-use and data-science ready  
1187 JSON format. We denote their results as RTP and compare them to the HCP-TR results computed with pyAFQ.

1188 **Measures of reliability.** pyAFQ gives the user the choice of which underlying algorithms to use when performing tractometry,  
1189 as shown in Fig. S2. We use this feature of pyAFQ to run multiple analyses on HCP-TR and UW-PREK, which both have test-  
1190 retest data. The analyses we selected represent only a small subset of the possible configurations of pyAFQ. However, because  
1191 the software is freely available and easily configurable with the API or CLI, it would be straightforward to test other analyses. To  
1192 compare the results on test-retest data (TRR) and compare results across analyses (robustness), we use four different measures  
1193 of reliability. Each one of these measures emphasizes different aspects of reliability.

1194 **Weighted Dice similarity coefficient (wDSC).** The anatomical reliability of bundle recognition solutions is assessed by compar-  
1195 ing their spatial overlap in the white matter volume. First, for every voxel in the white matter, we count the number of  
1196 streamlines that pass through that voxel for a given bundle, then divide by the total number of streamlines in that bundle. This  
1197 creates what we call a streamline density map (28). We could compare streamline density maps using a Dice similarity coeffi-  
1198 cient (94), but that would require applying a threshold to the density maps, and could give a few streamlines a large influence  
1199 on the calculation. Instead, we use the weighted Dice similarity coefficient (wDSC) (37):

$$D(i, j) = \frac{\sum_{v \in \mathcal{V}_i \cap \mathcal{V}_j} W_{i,v} + W_{j,v}}{\sum_{v \in \mathcal{V}_i} W_{i,v} + \sum_{v \in \mathcal{V}_j} W_{j,v}} \quad (1)$$

1200 where  $v$  is a voxel index,  $W_{i,v}$  is the streamline density for a bundle  $i$  in voxel  $v$ , and  $v^i$  are voxels where the two bundles  $i$  and  
1201  $j$  intersect. wDSC provides a measure of the reliability in the spatial extent of bundles, in a manner that is independent from  
1202 the assessment of tract profiles.

1203 **Adjusted contrast index profile (ACIP).** We use an adjusted contrast index to directly compare the values of individual nodes in  
1204 the tract profiles in different measurements. For two values ( $V_1, V_2$ ) in different profiles, the adjusted contrast index (ACI)  
1205 is calculated using Eq (2).

$$ACI(V1, V2) = 2 \frac{V_2 - V_1}{V_2 + V_1} \quad (2)$$

1206 We multiply by 2 to make the contrast index have comparable values to fractional difference. In contrast to fractional difference,  
1207 however, the ACI does not require one of the variables to be a reference, and  $ACI(V1, V2) = -ACI(V2, V1)$ . Calculating and  
1208 then plotting the ACI for each point between two profiles highlights the differences between profiles, producing the adjusted  
1209 contrast index profile (ACIP). ACIP emphasizes discrepancies in estimates along the length of the tract in a manner that does  
1210 not depend on the scale of the measurement (e.g., the different scales of FA and MD).



## 1211 **Supplementary Discussion of pyAFQ**

1212 **pyAFQ is embedded in an ecosystem of tools for reproducible neuroimaging.** The wider ecosystem of tools and standards  
1213 surrounding pyAFQ is shown in Fig. S6. Each tool has its own place in the ecosystem. We rely heavily on implementations  
1214 of dMRI analysis algorithms implemented in DIPY (28). Reproducibility and interoperability are also facilitated by relying on  
1215 the BIDS format (68) and the pyBIDS software (66, 67). Requiring a BIDS-like input makes integration with other software in  
1216 the ecosystem easier. For example, it is fairly straightforward to use the outputs of BIDS-compatible preprocessing pipelines,  
1217 such as qsiprep (95), as inputs to pyAFQ. Furthermore, the modularity of the pyAFQ pipeline means that outputs of other  
1218 tractography software (e.g., MRTRIX (96)) can be used as inputs to bundle recognition, with BIDS filters as the metadata that  
1219 allows finding and incorporating through the right data.

1220 Cloud-based processing is going to be more important as large datasets are processed. pyAFQ does not depend on proprietary  
1221 software and can be scaled to large datasets using cloud computing platforms. In this paper, we used Cloudknot (63) to scale  
1222 pyAFQ across subjects and methods on AWS. However, because pyAFQ is a Python package, it can easily be run on any cloud  
1223 computing platform. Computing in the public cloud also supports reproducible research, as computations conducted on the  
1224 public cloud are perfectly portable to other users of the software. Our software is written with that in mind, including functions  
1225 that know how to easily access datasets that are already stored in the cloud (e.g., HCP and Healthy Brain Network (97) datasets).  
1226 We know that one of the most important ways in which users can diagnose whether processing worked as expected is by visually  
1227 inspecting the results. Thus, we provide several different visualization methods, relying on the VTK-derived FURY library, or  
1228 on browser-friendly visualizations with Plotly. pyAFQ outputs are also fully compatible with AFQ-Browser, a browser-based  
1229 tool for interactive visualization and exploration of tractometry results (52).

1230 Finally, beyond visualization and summary of the results, and tools for analysis of reliability presented in this work, pyAFQ  
1231 does not provide a substantial set of tools for statistical analysis of tractometry results. Instead, the outputs of pyAFQ are  
1232 provided as “tidy” CSV tables (27). This means that it is compatible as inputs to the AFQ Insight tool for statistical analysis  
1233 (20), but also amenable to many other statistical analysis approaches. This output should facilitate interdisciplinary use of  
1234 dMRI data, as it is provided in a format that is widely used in statistics and machine learning.

1235 **pyAFQ is extensible.** In general, variability in results would be reduced with a standard pipeline that could be used across all  
1236 studies and datasets. However, as noted by Lindquist, “studies tend to be too varied for one pipeline to always be appropri-  
1237 ate” (98). This is particularly true as new measurement techniques, new processing methods and new analysis approaches for  
1238 dMRI are evolving. Therefore, the pyAFQ pipeline was designed to be flexible, making it easier to reproduce results, while  
1239 providing researchers with many choices for the appropriate analysis, depending on their data and questions. pyAFQ allows the  
1240 user to make many decisions (Fig S2), and all of those decisions can be encoded in a configuration file. That configuration file  
1241 can be used to reproduce the same analysis pipeline given the same version of pyAFQ is used. By providing the configuration  
1242 file or the arguments passed to the main API, one can clearly satisfy the requirement for a re-executable workflow outlined  
1243 in (53).

1244 To extend to new bundles, pyAFQ allows users to define new queries that recognize bundles that are not part of the set of 18  
1245 detected by the original mAFQ software. For a simple example, we use a set of alternative waypoint ROIs to detect different  
1246 portions of the corpus callosum (99) (Fig S7A). These alternative ROIs are included in pyAFQ but not used by default. In more  
1247 complicated example, another set of ROIs is used to recognize the location of the optic radiations (OR; Fig S7). Because these  
1248 are relatively small and winding, their delineation requires additional components: it requires several waypoint ROIs used not  
1249 only as inclusion criteria, but also as exclusion criteria, and it requires delineation of endpoints in the cortex that are not part of  
1250 the AAL atlas, which is used in the standard set of bundles. It also requires oversampling of streamlines, so in order to obtain  
1251 a proper definition of the OR, tractography is configured to use 125 seeds per voxel (instead of the default 8). All of these  
1252 components can be integrated into calls to the software API, without needing to change any of its internals. This includes any  
1253 custom waypoint ROIs, inclusive or exclusive, as well as probability maps, endpoint locations, and whether the bundle crosses  
1254 the midline.

1255 **Supplementary Figures and Tables**

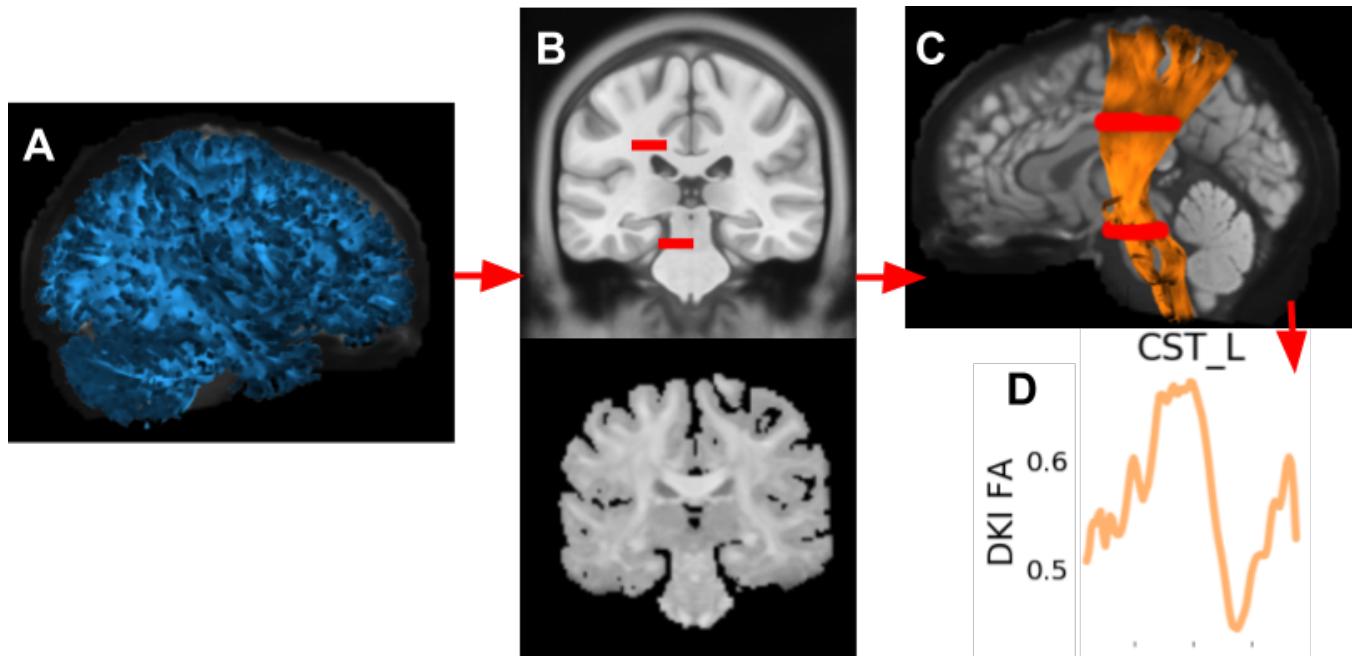

**Fig. S1. The stages of tractometry.** **A** Computational tractography generates streamlines estimating the trajectories of white matter connections. **B** An anatomical template is registered to each subject's individual brain. Here, in a mid-coronal view, the MNI T1-weighted template (29, 30), shown with the locations of waypoint ROIs for classification of the left corticospinal tract (5) (slightly enlarged for visualization purposes). The subject's anisotropic power map (APM) (31) is used as the target for registration, due to its similarity to the T1 contrast. **C** Classification of the streamlines. Here, in a lateral view, the streamlines classified as belonging to the left corticospinal tract (CST L), overlaid on a mid-sagittal slice of the subject's non-diffusion-weighted (b0) image. The streamlines are shaded by the subject's fractional anisotropy (FA) along their length. **D**, Tract profiles are extracted from the bundles. Here, the FA profile for CST L.

|       |                                            |
|-------|--------------------------------------------|
| ARC L | Left Arcuate                               |
| ARC R | Right Arcuate                              |
| ATR L | Left Thalamic Radiation                    |
| ATR R | Right Thalamic Radiation                   |
| CGC L | Left Cingulum Cingulate                    |
| CGC R | Right Cingulum Cingulate                   |
| CST L | Left Corticospinal                         |
| CST R | Right Corticospinal                        |
| FA    | Callosum Forceps Minor                     |
| FP    | Callosum Forceps Major                     |
| IFO L | Left Inferior Fronto-occipital Fasciculus  |
| IFO R | Right Inferior Fronto-occipital Fasciculus |
| ILF L | Left Inferior Longitudinal Fasciculus      |
| ILF R | Right Inferior Longitudinal Fasciculus     |
| SLF L | Left Superior Longitudinal Fasciculus      |
| SLF R | Right Superior Longitudinal Fasciculus     |
| UNC L | Left Uncinate                              |
| UNC R | Right Uncinate                             |

**Table S1. Abbreviations of the major white matter pathways recognized by pyAFQ.**

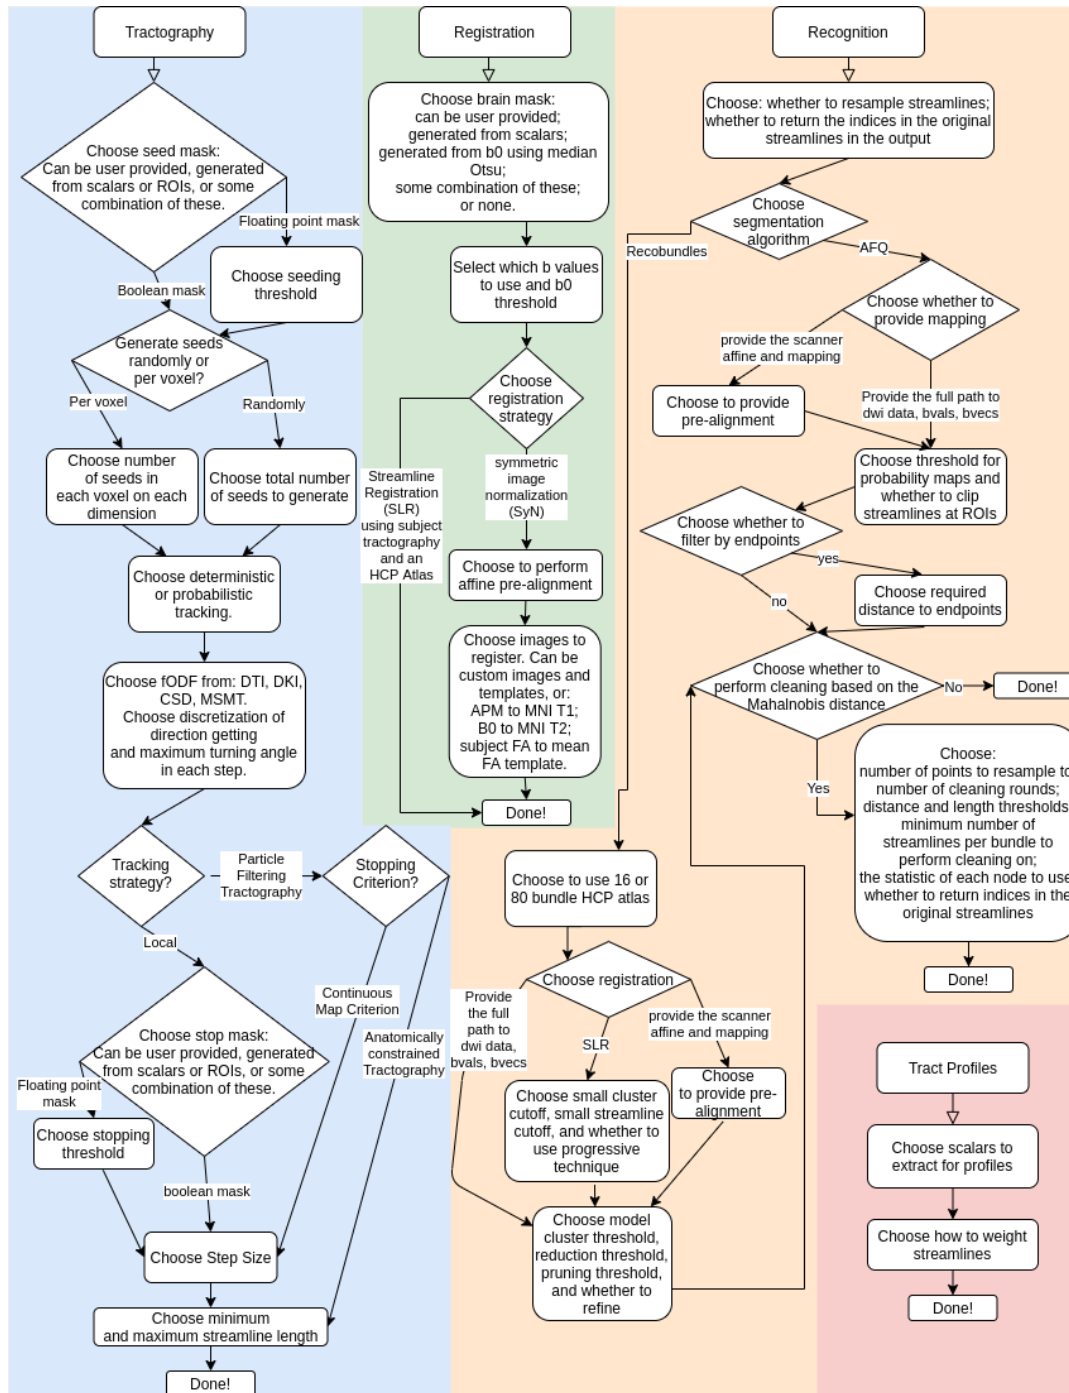

**Fig. S2. Choices the user can make for how to run pyAFQ.** The colors represent different steps of tractometry. Tractography is shaded blue, registration is shaded green, recognition is shaded orange, and tract profiles is shaded red. Every rounded box and diamond contains one or more choices, except for the rounded boxes marked "Done!", which indicates all choices have been made. Diamonds indicate the path you take depends on the choice in the diamond. pyAFQ has reasonable defaults for all of these decisions; however it also makes it simple for the user to customize their tractometry pipeline according to their needs.





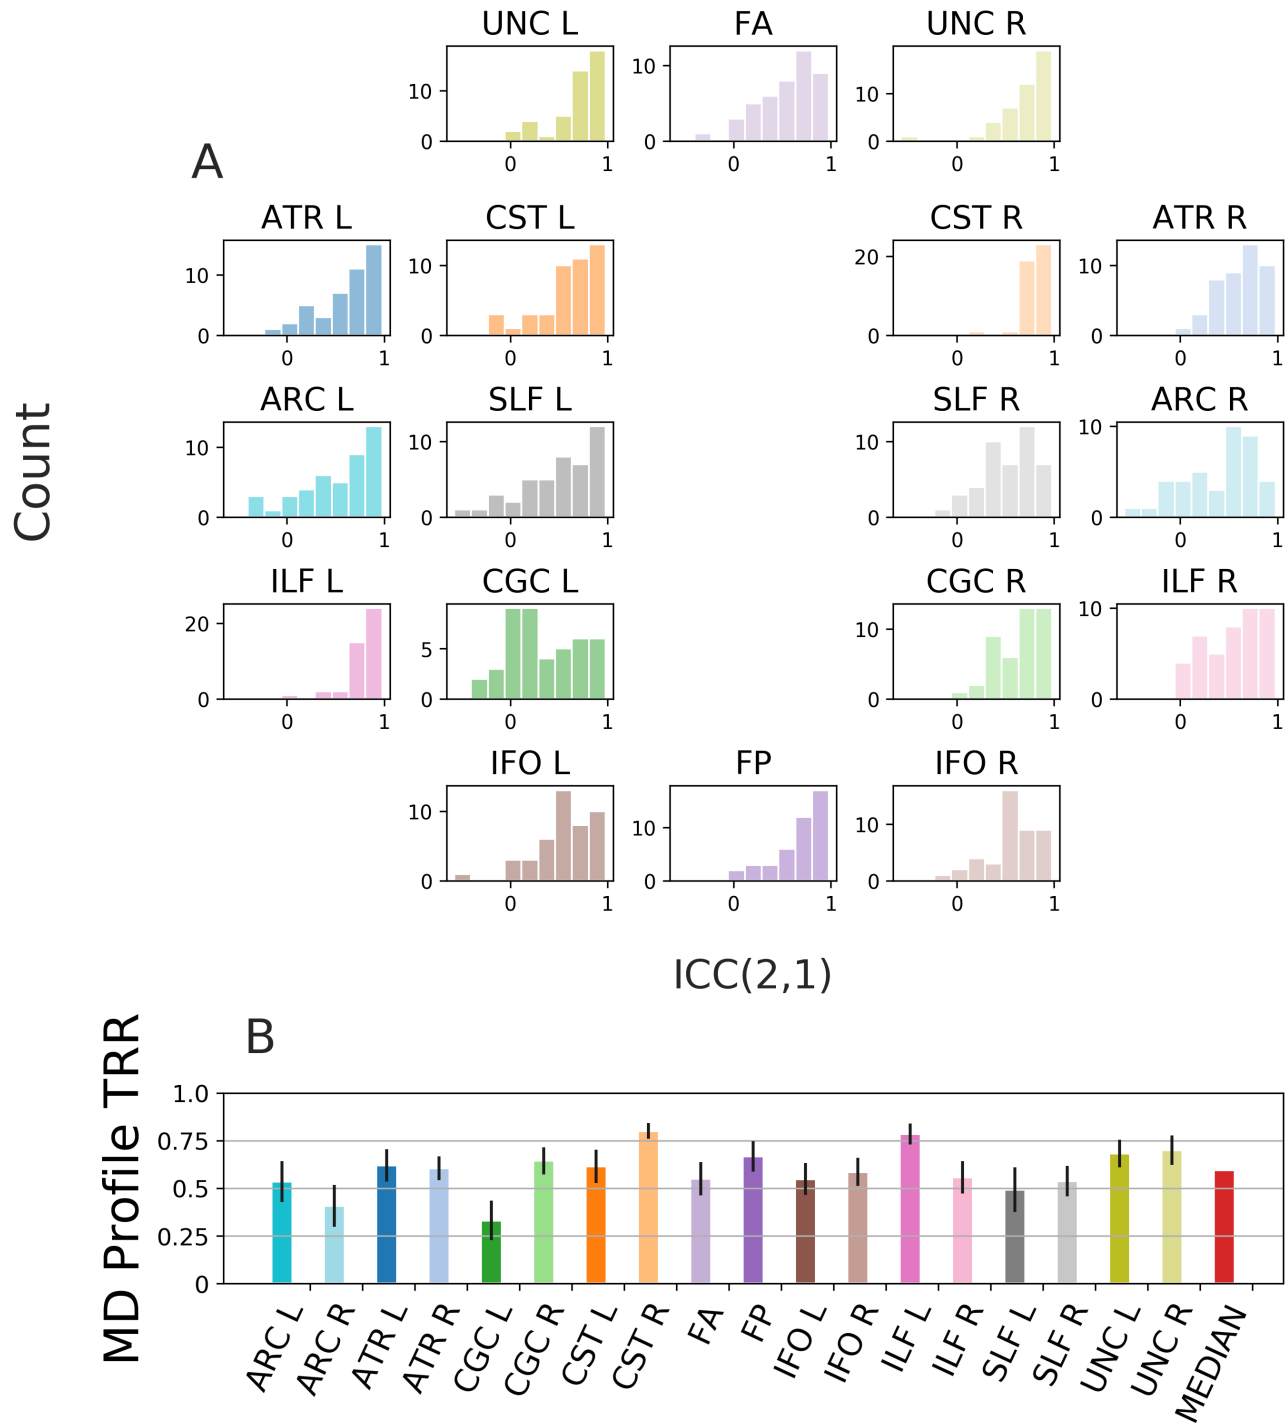

**Fig. S4. MD profile test-retest reliability** **A:** Histograms of individual subject ICC between the MD tract profiles across sessions for a given bundle. Colors encode the bundles, matching the diagram showing the rough anatomical positions of the bundles for the left side of the brain (center). **B:** Mean ( $\pm$  95% confidence interval) TRR for each bundle, color-coded to match the histograms and the bundles diagram, with median across bundles in red.

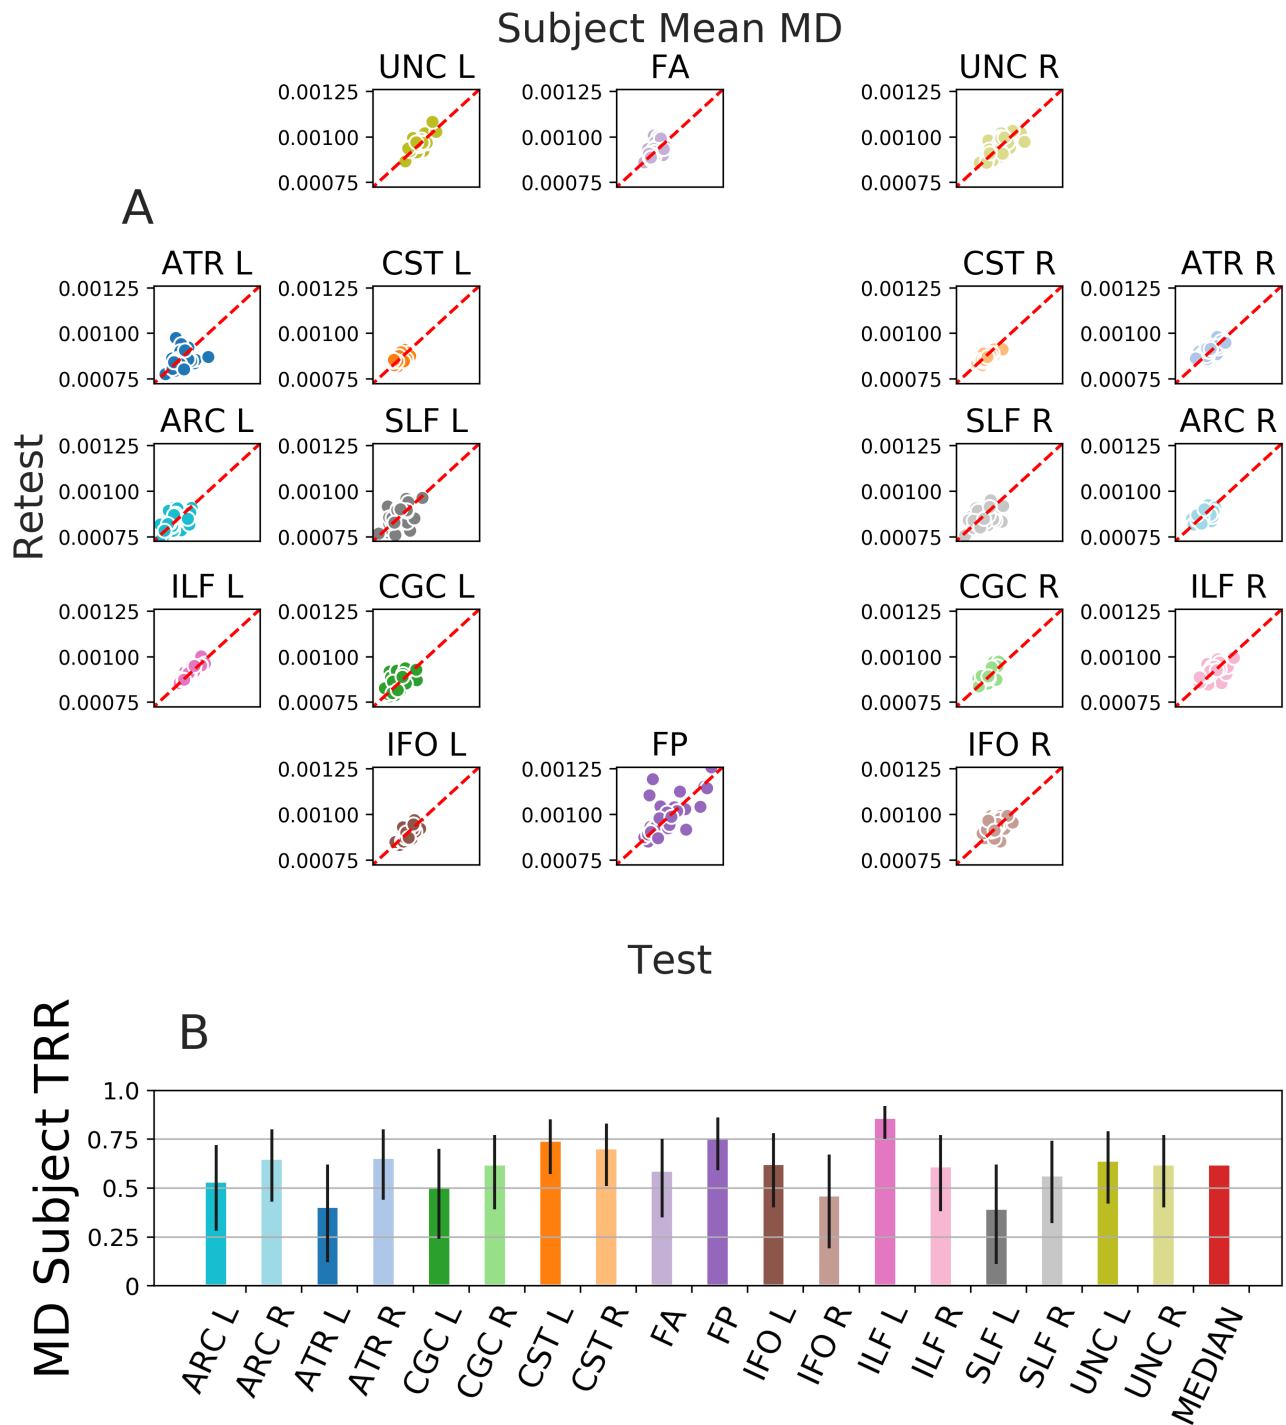

**Fig. S5. Subject test-retest reliability** **A:** Mean tract profiles for a given bundle and the MD scalar for each subject using the first and second session of HCP-TR. Colors encode bundle information, matching the core of the bundles (center). **B:** subject reliability is calculated from the Spearman's  $\rho$  of these distributions, with median across bundles in red. Error bars show the 95% confidence interval.

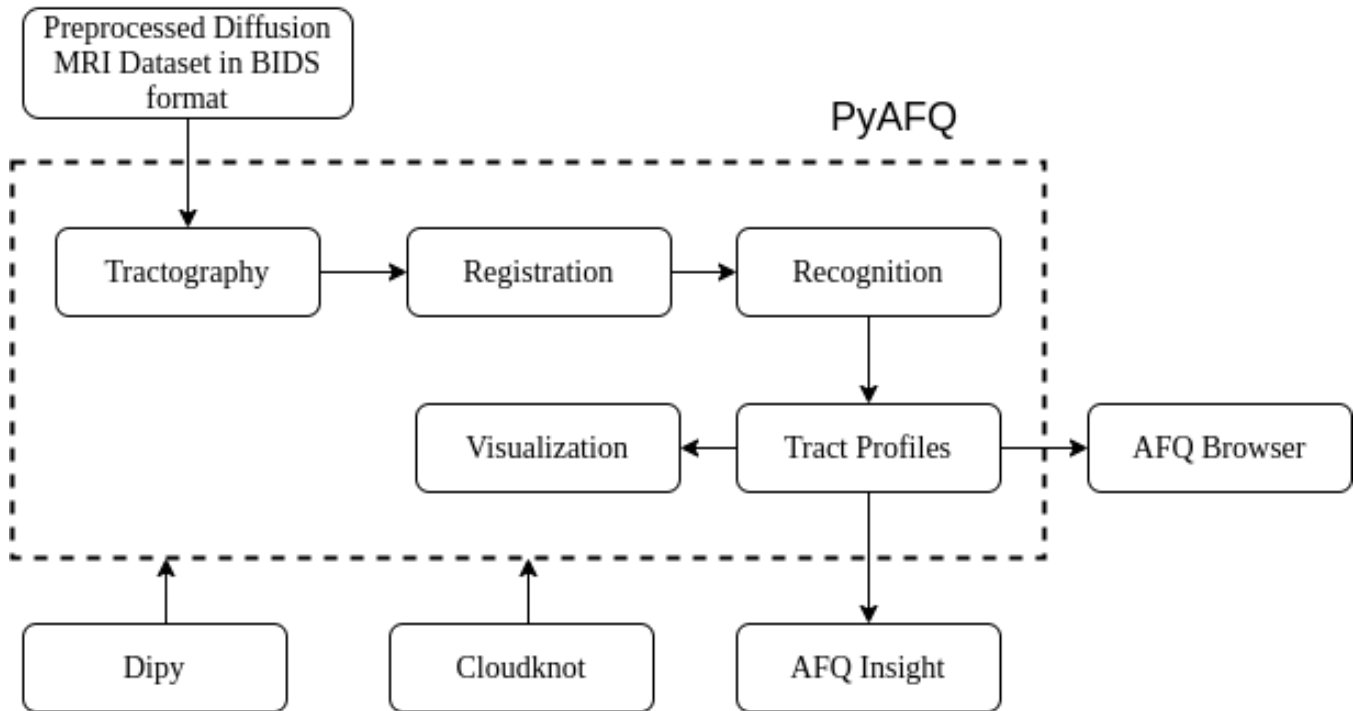

**Fig. S6.** The pyAFQ software is intergrated into an ecosystem for reproducible tractometry Steps performed by pyAFQ are enclosed in the dotted rectangle, whereas steps outside that rectangle are performed by other software. Upper left: pyAFQ requires preprocessed diffusion MRI data in BIDS format. This could be from QSIprep (26) or dMRIprep (<https://github.com/nipreps/dmriprep>). Bottom right: pyAFQ outputs can serve as inputs to AFQ Browser for further interaction and visualization (52) or AFQ Insight for statistical analysis (20). Bottom left: pyAFQ uses DIPY (28) for the implementation of dMRI algorithms. pyAFQ uses Cloudknot (63) to scale processing by parallelizing across subjects in AWS.

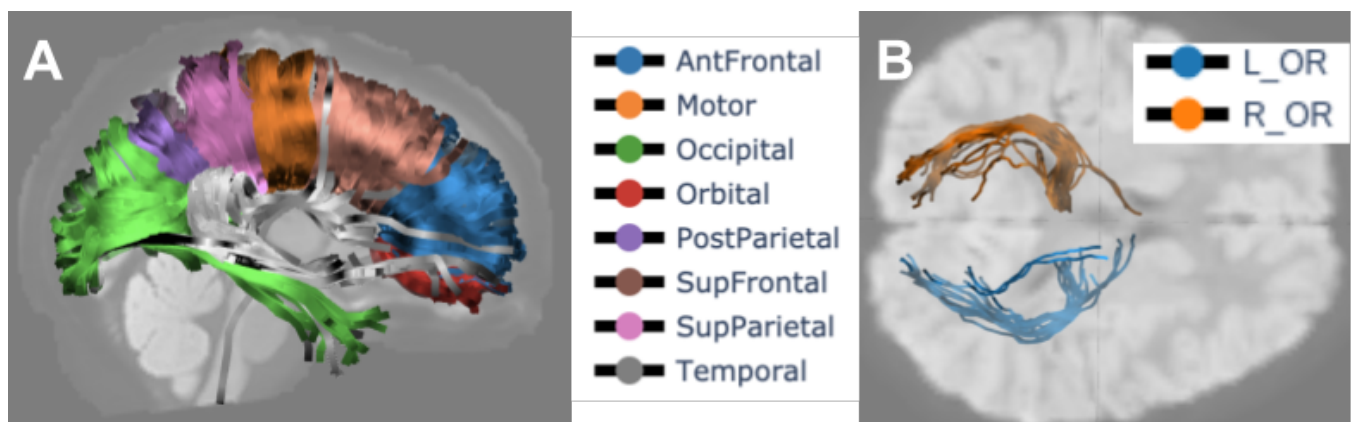

**Fig. S7.** Callosal bundles from HCP-TR, optic radiations from UW-PREK, found by pyAFQ. Streamlines are colored according to their bundles and shaded according to FA. The background images are each a b0 slice. **A** callosal bundles found by pyAFQ on an example subject from HCP-TR. **B** optic radiations found by pyAFQ on an example subject from UW-PREK.
